# Supplementary material for: Long-lived rodents reveal signatures of positive selection in genes associated with lifespan
Source: PLOS journal article supplement (doi:10.1371/journal.pgen.1007272), 2018-03-23

**S3 Fig. GC-content of examined sequence.**

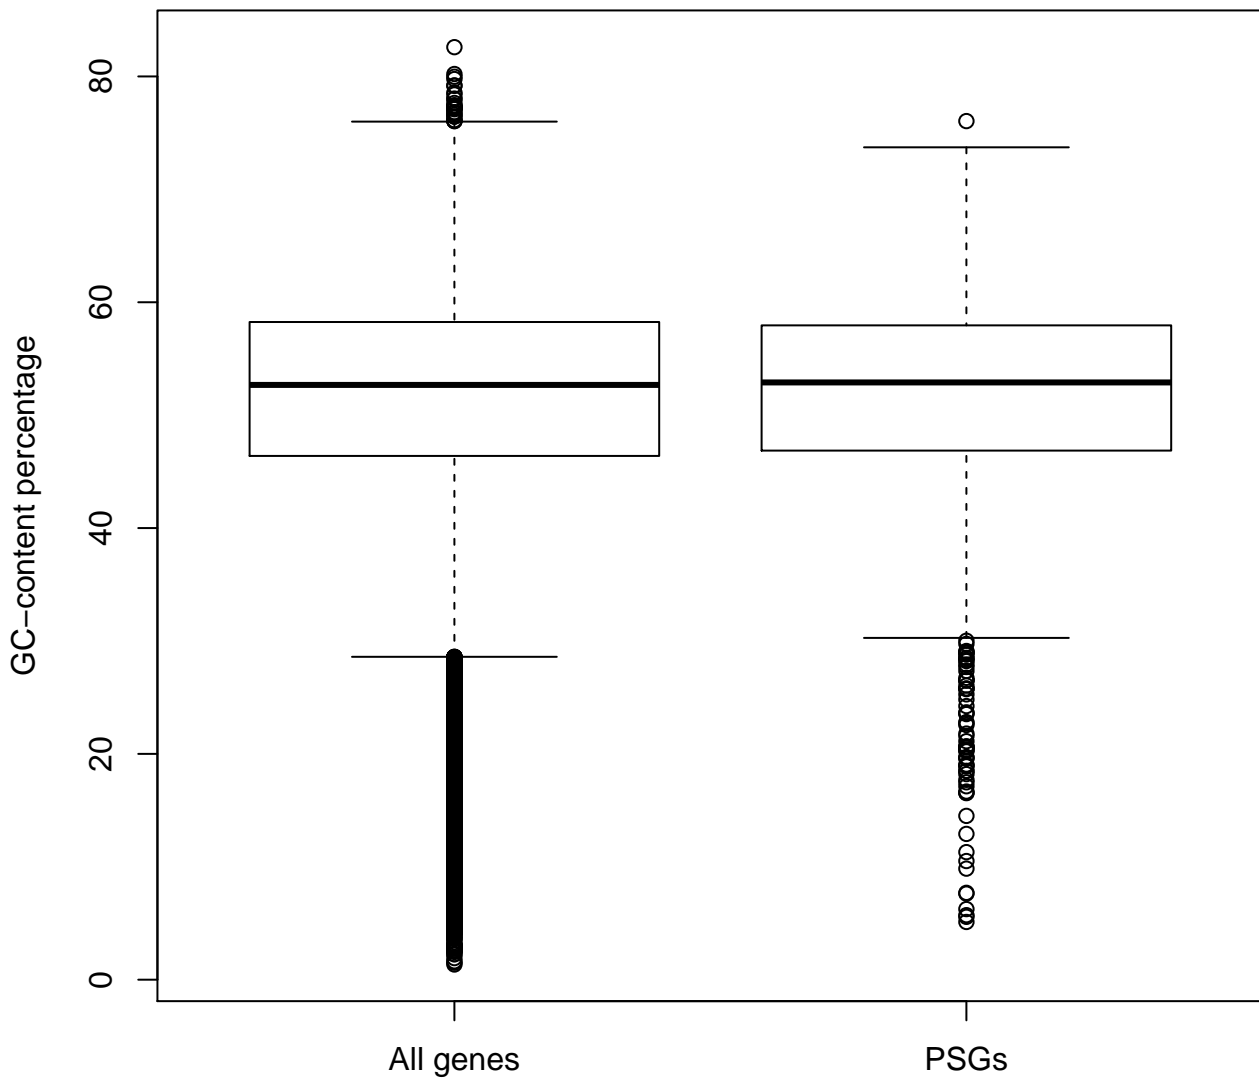

Supplement: S3 (10.1371/journal.pgen.1007272.s003) [file journal.pgen.1007272.s003]
