# Supplementary material for: Long-lived rodents reveal signatures of positive selection in genes associated with lifespan
Source: PLoS Genet. 2018 Mar 23;14(3):e1007272. doi: 10.1371/journal.pgen.1007272 (PMC5884551; doi:10.1371/journal.pgen.1007272)
Supplement: S3 Table — (XLSX) [file pgen.1007272.s007.xlsx]

## Sheet: Table
S3 Table. PSGs on multiple branches.
	1	2	3	4	5	6	7	8	9	10	11
GCNT2	FALSE	TRUE	FALSE	FALSE	FALSE	FALSE	FALSE	TRUE	FALSE	FALSE	FALSE
HLA-A	FALSE	TRUE	FALSE	FALSE	FALSE	FALSE	FALSE	TRUE	FALSE	FALSE	FALSE
MYH6	FALSE	FALSE	FALSE	FALSE	FALSE	FALSE	FALSE	TRUE	TRUE	FALSE	FALSE
UGT1A9	FALSE	FALSE	FALSE	FALSE	FALSE	FALSE	FALSE	TRUE	TRUE	FALSE	FALSE
FPR2	FALSE	FALSE	FALSE	FALSE	FALSE	FALSE	FALSE	FALSE	TRUE	TRUE	FALSE
ZFP41	FALSE	TRUE	TRUE	FALSE	FALSE	FALSE	FALSE	FALSE	TRUE	FALSE	FALSE
AMHR2	FALSE	TRUE	FALSE	FALSE	FALSE	FALSE	FALSE	FALSE	FALSE	FALSE	TRUE
C16ORF78	FALSE	TRUE	FALSE	FALSE	FALSE	FALSE	FALSE	FALSE	FALSE	TRUE	FALSE
