# Supplementary material for: Long-lived rodents reveal signatures of positive selection in genes associated with lifespan
Source: PLoS Genet. 2018 Mar 23;14(3):e1007272. doi: 10.1371/journal.pgen.1007272 (PMC5884551; doi:10.1371/journal.pgen.1007272)
Supplement: S13 Table — (XLSX) [file pgen.1007272.s017.xlsx]

## Sheet: Table
S13 Table. Results on branch 9.
Gene	Transcript	FDR	P.Value	Number.of.species.included	Number.of.Sites.under.positive.Selection	Confirmed as significant in two additional runs
SCN7A	c203339.graph_c3_seq29	0	0	6	50	confirmed
MYH6	c203703.graph_c0_seq2	0	0	9	27	confirmed
FGFR2	c189953.graph_c0_seq12	4.4546775e-14	5.551e-16	4	12	confirmed
TPM3	c203718.graph_c6_seq17	4.4546775e-14	5.551e-16	7	15	confirmed
TUBB3	c203482.graph_c1_seq9	1.65315e-08	2.575e-10	7	10	confirmed
FXR2	c178293.graph_c0_seq8	1.851635e-08	3.461e-10	15	2	confirmed
MAP2K1	c188754.graph_c0_seq8	1.77742285714286e-06	3.876e-08	13	9	confirmed
GJB3	c192503.graph_c0_seq4	2.73371625e-05	6.813e-07	11	4	confirmed
MMP9	c172769.graph_c0_seq1	2.88115333333333e-05	8.078e-07	10	4	confirmed
FAM46A	c169775.graph_c0_seq5	3.19395e-05	9.95e-07	12	5	confirmed
SLCO1B3	c197683.graph_c0_seq3	0.000196539545454545	6.735e-06	5	12	confirmed
PDLIM5	c202203.graph_c1_seq23	0.0005438275	2.033e-05	10	1	confirmed
PDLIM5	c202203.graph_c1_seq10	0.000710397692307692	2.877e-05	10	1	confirmed
TEX14	c202975.graph_c1_seq39	0.000779657361687983	3.40037478617812e-05	5	2	confirmed
ING4	c174014.graph_c0_seq4	0.0013040625	6.33e-05	14	5	confirmed
ING4	c174014.graph_c0_seq3	0.0013040625	6.5e-05	14	5	confirmed
TNRC6B	c179215.graph_c0_seq2	0.00151082301742581	8.0012433944669e-05	5	1	confirmed
PCDHGA11	c202143.graph_c1_seq40	0.00153184578947368	9.067e-05	6	15	confirmed
PCDHGA11	c202143.graph_c1_seq11	0.00153184578947368	9.067e-05	6	15	confirmed
TRIM5	c203701.graph_c3_seq12	0.00154538571428571	9.976e-05	4	12	confirmed
CD1D	c203456.graph_c0_seq67	0.00154538571428571	0.0001011	5	4	confirmed
TNRC6B	c179215.graph_c0_seq1	0.00334204173520544	0.000229049589328722	5	1	confirmed
LRAT	c200101.graph_c0_seq2	0.00864885652173913	0.0006197	11	1	confirmed
SH3GL2	c186924.graph_c0_seq6	0.0132573	0.0009912	13	4	confirmed
GPR133	c203533.graph_c2_seq21	0.01520256	0.001184	10	2	confirmed
FPR2	c194796.graph_c0_seq4	0.0172475769230769	0.001397	11	5	confirmed
UGT1A9	c202539.graph_c2_seq4	0.0188557777777778	0.001586	8	11	confirmed
C2ORF70	c236857.graph_c0_seq1	0.0197988214285714	0.001727	7	1	confirmed
EXOC6	c182068.graph_c0_seq2	0.0291468	0.002724	10	3	confirmed
EXOC6	c182068.graph_c0_seq3	0.0291468	0.002724	10	3	confirmed
RHEBL1	c177102.graph_c1_seq3	0.0309091935483871	0.002985	10	1	confirmed
NPNT	c203123.graph_c0_seq37	0.0317317941176471	0.003322	6	1	confirmed
NPNT	c203123.graph_c0_seq3	0.0317317941176471	0.00333	6	1	confirmed
NPNT	c203123.graph_c0_seq35	0.0317317941176471	0.003361	6	1	confirmed
XIRP1	c191267.graph_c0_seq3	0.0398406857142857	0.004344	9	4	confirmed
TACC3	c197056.graph_c1_seq55	0.0591264166666667	0.006631	6	3	confirmed
TTC26	c203539.graph_c3_seq8	0.068025972972973	0.007841	9	5	confirmed
SRGAP3	c178190.graph_c0_seq3	0.0694542631578947	0.008222	10	1	confirmed
ZNF205	c198460.graph_c1_seq23	0.0716735384615385	0.008708	5	3	not confirmed
ZFP41	c202011.graph_c0_seq7	0.09477525	0.01181	6	1	confirmed
NFAM1	c158187.graph_c0_seq1	0.102093658536585	0.01304	5	7	not significant
PPFIA1	c199284.graph_c1_seq14	0.108841395348837	0.01453	14	2	not significant
CLEC4D	c187453.graph_c0_seq12	0.108841395348837	0.01458	4	2	not significant
PARP14	c199244.graph_c0_seq10	0.120054	0.0168	5	3	not significant
SKA3	c201131.graph_c0_seq8	0.120054	0.01683	6	2	not significant
AGER	c190528.graph_c0_seq1	0.137820652173913	0.01975	13	3	not significant
CCDC83	c199754.graph_c1_seq37	0.148206382978723	0.0217	6	4	not significant
GALNT5	c195445.graph_c0_seq3	0.159095625	0.02379	9	4	not significant
TRDN	c200936.graph_c1_seq3	0.179891020408163	0.02746	8	2	not significant
SPHKAP	c202656.graph_c3_seq31	0.2363844	0.03682	8	3	not significant
TICRR	c185661.graph_c0_seq5	0.351022941176471	0.05577	6	4	not significant
UBTD1	c176442.graph_c0_seq2	0.491438653846154	0.07961	14	4	not significant
BRD4_6	c184542.graph_c3_seq7	0.570814927857514	0.0942467014842625	6	2	not significant
ARHGEF11	c203243.graph_c0_seq66	0.645009617991026	0.108506290876995	7	2	not significant
TUBB3	c203023.graph_c0_seq4_PART0	0.662069475253363	0.113438695136869	7	2	not significant
NCKAP5L	c200190.graph_c2_seq29	0.748617857142857	0.1306	11	9	not significant
COL4A6	c193303.graph_c2_seq10	0.755757894736842	0.1342	7	2	not significant
PON3	c201997.graph_c5_seq84	0.767079310344828	0.1386	15	3	not significant
LYRM9	c201431.graph_c5_seq2	0.850377966101695	0.1563	15	2	not significant
RSC1A1	c199173.graph_c0_seq5	0.99938	0.1868	6	9	not significant
GANC	c189874.graph_c1_seq6	1	0.2174	12	2	not significant
GATAD2A	c204058.graph_c1_seq1	1	0.2295	5	2	not significant
NCAPG	c199626.graph_c0_seq8	1	0.2306	10	1	not significant
TMEM130	c143569.graph_c0_seq9	1	0.2437	7	2	not significant
ASPSCR1	c169143.graph_c0_seq3	1	0.2468	14	4	not significant
VMP1	c203491.graph_c1_seq13	1	0.2468	15	2	not significant
NUTM1	c162702.graph_c0_seq3	1	0.2487	5	7	not significant
STOX1	c189213.graph_c0_seq2	1	0.2675	7	8	not significant
PRIMPOL	c200508.graph_c0_seq5	1	0.2723	9	1	not significant
PLAUR	c194877.graph_c1_seq10	1	0.2738	5	2	not significant
C1ORF158	c156373.graph_c0_seq1	1	0.2744	10	2	not significant
ATP6V0D2	c143178.graph_c0_seq1	1	0.2767	12	2	not significant
PAG1	c201146.graph_c3_seq1	1	0.2802	12	2	not significant
NLRX1	c194406.graph_c0_seq1	1	0.2804	10	2	not significant
NLRX1	c194406.graph_c0_seq14	1	0.2804	10	2	not significant
RSPO1	c193328.graph_c0_seq17	1	0.2883	11	2	not significant
CLCA2	c202406.graph_c0_seq1	1	0.2886	8	5	not significant
TRIM45	c197849.graph_c1_seq13	1	0.309	7	1	not significant
DOK3_7	c184815.graph_c0_seq4	1	0.3219	6	1	not significant
TMEM130	c143569.graph_c0_seq2	1	0.3252	9	2	not significant
KCNK13	c200870.graph_c0_seq3	1	0.3341	9	1	not significant
KPNA7	c141037.graph_c0_seq1	1	0.3353	4	1	not significant
FUT7	c191638.graph_c1_seq3	1	0.3361	9	1	not significant
PPP1R3A	c201217.graph_c0_seq1	1	0.3396	5	5	not significant
RBM48	c189604.graph_c2_seq2	1	0.3438	12	7	not significant
ZNRF3	c193245.graph_c1_seq17	1	0.3523	10	1	not significant
LAMB2	c202963.graph_c1_seq20	1	0.3553	12	6	not significant
ZNRF3	c193245.graph_c1_seq2	1	0.362	10	1	not significant
DDX60	c203364.graph_c1_seq69	1	0.3646	7	10	not significant
PODXL	c194187.graph_c0_seq6	1	0.3694	5	5	not significant
OLFR710	c199395.graph_c0_seq2	1	0.3743	10	1	not significant
PMS-2	c200237.graph_c0_seq13	1	0.3806	8	5	not significant
RBFOX2	c194110.graph_c2_seq30	1	0.3819	13	1	not significant
ZRANB1	c195627.graph_c0_seq11	1	0.3824	13	1	not significant
ADCK1	c199514.graph_c0_seq13	1	0.3844	9	3	not significant
NUMA1	c197889.graph_c0_seq6	1	0.3906	4	5	not significant
USPL1	c201845.graph_c1_seq10	1	0.3906	6	7	not significant
PRDX5	c203186.graph_c1_seq1	1	0.3909	9	1	not significant
ZMYND15	c157903.graph_c0_seq3	1	0.3947	10	4	not significant
CALD1_6	c193688.graph_c0_seq8	1	0.3988	5	2	not significant
PLCE1	c198382.graph_c0_seq14	1	0.4015	10	1	not significant
C17ORF100	c175964.graph_c1_seq7	1	0.4048	7	1	not significant
RNASE6	c190865.graph_c0_seq2	1	0.405	11	1	not significant
LOC708375	c156670.graph_c0_seq1	1	0.4062	9	1	not significant
GSTK1	c517785.graph_c0_seq1	1	0.4136	6	1	not significant
C6ORF163	c200942.graph_c3_seq5	1	0.4143	4	4	not significant
FAM193B_8	c182912.graph_c0_seq9	1	0.4181	10	1	not significant
NHLRC3	c196245.graph_c2_seq1	1	0.4183	13	1	not significant
FUZ	c181755.graph_c0_seq2	1	0.4216	10	1	not significant
LYZ	c193753.graph_c8_seq1	1	0.4256	15	2	not significant
HNF4A	c188685.graph_c1_seq5	1	0.4277	12	1	not significant
HNF4A	c188685.graph_c1_seq1	1	0.4283	12	1	not significant
SLC38A2	c201967.graph_c3_seq3	1	0.4294	14	1	not significant
OGFOD1	c199575.graph_c0_seq7	1	0.43	14	1	not significant
SHOC2	c182608.graph_c0_seq8	1	0.4311	11	1	not significant
DYDC1	c155364.graph_c0_seq5	1	0.4316	8	1	not significant
NRIP3	c139554.graph_c0_seq1	1	0.4316	14	1	not significant
SAT2	c192441.graph_c0_seq39	1	0.4318	14	1	not significant
TSR2	c204214.graph_c0_seq1	1	0.4406	14	1	not significant
VILL	c201072.graph_c0_seq79	1	0.441	5	5	not significant
PIAS2	c194742.graph_c0_seq38	1	0.4411	10	1	not significant
HNF4A	c188685.graph_c1_seq4	1	0.4426	12	1	not significant
HNF4A	c188685.graph_c1_seq3	1	0.4426	12	1	not significant
KLHDC8A	c185698.graph_c2_seq4	1	0.4441	10	1	not significant
GRIA4	c198098.graph_c0_seq79	1	0.4501	8	1	not significant
TCF25	c198637.graph_c9_seq34	1	0.4518	16	1	not significant
CLDN8	c144791.graph_c0_seq1	1	0.452	13	1	not significant
NUP43	c150245.graph_c2_seq3	1	0.4523	14	1	not significant
ZNF593	c198167.graph_c0_seq2	1	0.453	16	1	not significant
APBB3	c201042.graph_c1_seq97	1	0.4552	8	3	not significant
BACE1	c184030.graph_c0_seq11	1	0.46	8	1	not significant
FANCD2OS	c40477.graph_c0_seq2	1	0.4614	10	1	not significant
PSMA8	c175450.graph_c0_seq2	1	0.4617	10	1	not significant
CECR5	c157868.graph_c0_seq1	1	0.4631	13	1	not significant
CDCA7	c184173.graph_c0_seq18	1	0.4631	7	1	not significant
TC2N	c196842.graph_c1_seq7	1	0.4632	13	1	not significant
BIN3	c197811.graph_c1_seq10	1	0.4648	15	1	not significant
ZBTB33	c137710.graph_c0_seq1	1	0.4655	13	1	not significant
FBXO39	c168565.graph_c0_seq1	1	0.4685	10	1	not significant
AP1AR	c202569.graph_c2_seq2	1	0.47	14	2	not significant
USP5	c195964.graph_c0_seq9	1	0.4718	14	1	not significant
CMYA5_3	c203132.graph_c0_seq1	1	0.4726	4	13	not significant
USP5	c195964.graph_c0_seq28	1	0.4733	14	1	not significant
NDUFS6	c230385.graph_c0_seq1	1	0.4746	15	1	not significant
ADCK1	c199514.graph_c0_seq11	1	0.4748	10	1	not significant
DNAJB9	c184090.graph_c0_seq2	1	0.4753	14	1	not significant
FAM192A	c203080.graph_c3_seq12	1	0.4792	16	2	not significant
TIMMDC1	c202869.graph_c1_seq63	1	0.4831	12	5	not significant
CWF19L1	c176191.graph_c0_seq6	1	0.4843	11	2	not significant
SLC35E2B	c201032.graph_c9_seq13	1	0.4856	11	1	not significant
TROVE2	c150221.graph_c0_seq1	1	0.4876	4	1	not significant
TMEM151A	c108495.graph_c0_seq1	1	0.491092571678385	8	1	not significant
C11ORF24	c184065.graph_c0_seq1	1	0.4948	8	4	not significant
CASC1	c203604.graph_c0_seq4	1	0.512	4	5	not significant
KCNE2	c159362.graph_c0_seq1	1	0.5202	11	1	not significant
MFSD6	c199040.graph_c0_seq2	1	0.5233	12	3	not significant
FBXO7	c198144.graph_c0_seq25	1	0.5247	6	2	not significant
TLR9	c194032.graph_c0_seq2	1	0.5254	4	1	not significant
C20ORF196	c192141.graph_c0_seq4	1	0.5271	5	4	not significant
AHRR	c193613.graph_c0_seq2	1	0.5294	5	6	not significant
GM6750	c147743.graph_c0_seq2	1	0.5336	16	1	not significant
OSBPL10	c181774.graph_c0_seq8	1	0.5338	6	1	not significant
EME1	c203298.graph_c1_seq19	1	0.5451	5	3	not significant
SRM	c194009.graph_c1_seq2	1	0.5451	15	2	not significant
GUK1	c195416.graph_c1_seq35	1	0.5451	16	1	not significant
CCDC106	c168138.graph_c0_seq6	1	0.548	11	1	not significant
GSAP	c202363.graph_c0_seq28	1	0.5579	8	3	not significant
ARMC2	c202451.graph_c1_seq40	1	0.5761	9	5	not significant
PAQR8	c189185.graph_c1_seq1	1	0.6004	12	1	not significant
CPLX1	c162658.graph_c0_seq2	1	0.6071	14	1	not significant
NFATC4	c203406.graph_c0_seq9	1	0.6076	10	3	not significant
NFATC4	c203406.graph_c0_seq38	1	0.6076	10	3	not significant
RGAG1	c164939.graph_c0_seq1	1	0.6077	4	4	not significant
RGS3	c198045.graph_c0_seq22	1	0.6086	4	4	not significant
RSPH1	c200740.graph_c0_seq56	1	0.6156	9	1	not significant
APOH	c158851.graph_c2_seq1	1	0.62	15	3	not significant
MTMR4	c184033.graph_c0_seq3	1	0.6404	13	1	not significant
DCLRE1A	c195182.graph_c0_seq8	1	0.6414	5	8	not significant
DDX50	c190676.graph_c0_seq31	1	0.6476	14	2	not significant
LPGAT1	c195797.graph_c0_seq5	1	0.6481	12	7	not significant
POLN	c200184.graph_c0_seq24	1	0.6487	6	1	not significant
SLC44A3	c194123.graph_c0_seq19	1	0.6534	9	5	not significant
MUC13	c177512.graph_c0_seq8	1	0.6558	4	3	not significant
CATSPERB	c263542.graph_c0_seq1	1	0.662	5	2	not significant
SNRNP35	c179936.graph_c1_seq1	1	0.6652	11	1	not significant
MRI1	c199893.graph_c7_seq5	1	0.6661	8	1	not significant
ACAD11	c170213.graph_c0_seq1	1	0.6759	13	3	not significant
SETD4	c203439.graph_c1_seq17	1	0.681	9	3	not significant
MTF1	c199609.graph_c0_seq9	1	0.6899	13	1	not significant
SP110	c203578.graph_c1_seq21	1	0.6941	5	3	not significant
ARMC4	c202481.graph_c0_seq16	1	0.7113	8	3	not significant
SLC5A9	c196147.graph_c0_seq40	1	0.7161	9	4	not significant
LOC465559	c190908.graph_c3_seq13	1	0.7366	5	5	not significant
RBM44	c194497.graph_c0_seq4	1	0.7409	4	4	not significant
BTBD16	c201977.graph_c1_seq6	1	0.7416	6	4	not significant
CASC1	c203604.graph_c0_seq42	1	0.7441	4	4	not significant
IL6ST	c199016.graph_c8_seq2	1	0.7532	8	4	not significant
TMEM2	c200591.graph_c3_seq1	1	0.7616	10	2	not significant
SLC7A13	c190982.graph_c1_seq2	1	0.7748	13	3	not significant
C19ORF57	c195424.graph_c0_seq6	1	0.7848	4	5	not significant
ARHGEF1	c196454.graph_c2_seq34	1	0.7979	8	2	not significant
PLD4	c181201.graph_c0_seq1	1	0.7985	5	3	not significant
TDRKH	c165072.graph_c0_seq1	1	0.8077	12	2	not significant
CASC1	c203604.graph_c0_seq5	1	0.8224	5	5	not significant
CASC1	c203604.graph_c0_seq33	1	0.8255	5	5	not significant
FICD	c196962.graph_c1_seq1	1	0.8471	14	2	not significant
ASCC2	c202331.graph_c0_seq8	1	0.8544	10	4	not significant
TLR4	c192717.graph_c0_seq2	1	0.8549	7	2	not significant
MASTL	c196158.graph_c1_seq4	1	0.8597	6	2	not significant
FOXN1	c199141.graph_c1_seq16	1	0.8637	8	1	not significant
MINA	c197345.graph_c0_seq26	1	0.8812	13	1	not significant
SUSD1	c198010.graph_c1_seq1	1	0.8872	4	5	not significant
IGSF5	c201011.graph_c2_seq7	1	0.8902	6	3	not significant
GJB4	c192503.graph_c0_seq1	1	0.8921	10	1	not significant
GPC5	c200921.graph_c0_seq5	1	0.897	10	3	not significant
MCPH1	c196402.graph_c0_seq1	1	0.9111	4	4	not significant
N6AMT2	c172980.graph_c0_seq3	1	0.9136	15	1	not significant
C10ORF12	c184566.graph_c0_seq5	1	0.9222	4	2	not significant
DGCR2	c198040.graph_c8_seq2	1	0.9225	12	2	not significant
ALS2CR12	c194513.graph_c0_seq4	1	0.9249	4	5	not significant
C4ORF22	c190096.graph_c0_seq13	1	0.9274	7	3	not significant
C5ORF42	c203371.graph_c0_seq22	1	0.9284	5	6	not significant
UROS	c193977.graph_c1_seq26	1	0.9373	13	2	not significant
TRAF3IP2_9	c195081.graph_c0_seq10	1	0.9394	4	2	not significant
ARHGEF1	c196454.graph_c2_seq50	1	0.9452	8	1	not significant
ACTL7A	c227572.graph_c0_seq1	1	0.968	11	3	not significant
SIT1	c160247.graph_c0_seq3	1	0.9715	5	1	not significant
TONSL	c201219.graph_c0_seq10	1	0.9855	10	2	not significant
TRIM6	c203218.graph_c0_seq32	1	0.9871	9	3	not significant
EIF4G3	c194292.graph_c3_seq23	1	0.9902	9	2	not significant
CDH16	c197761.graph_c0_seq30	1	0.994	13	1	not significant
HSD17B4	c144667.graph_c0_seq1	1	0.9963	4	3	not significant
CORO7-PAM16	c201487.graph_c1_seq3	1	0.9972	10	2	not significant
BBS10	c191917.graph_c0_seq1	1	0.9977	7	3	not significant
TMCC3	c201569.graph_c3_seq11	1	1	12	43	not significant
TCF3	c200090.graph_c0_seq2	1	1	9	11	not significant
KRT14	c199022.graph_c1_seq73	1	1	9	14	not significant
PFN2	c148997.graph_c0_seq1	1	1	13	8	not significant
KIAA0556	c203215.graph_c3_seq15	1	1	4	24	not significant
TACC2	c203551.graph_c1_seq26	1	1	4	33	not significant
TACC2	c203551.graph_c1_seq8	1	1	4	32	not significant
CASP1	c187354.graph_c0_seq3	1	1	4	2	not significant
ADAMTS7	c203744.graph_c0_seq36	1	1	4	8	not significant
MYZAP	c158267.graph_c0_seq2	1	1	14	2	not significant
COBLL1	c198727.graph_c0_seq3	1	1	5	4	not significant
SPPL2C	c172129.graph_c0_seq1	1	1	8	6	not significant
C17ORF104	c179048.graph_c0_seq1	1	1	8	4	not significant
EFHB	c185447.graph_c0_seq13	1	1	5	5	not significant
BDP1	c195242.graph_c0_seq2	1	1	4	13	not significant
CCDC89	c153565.graph_c0_seq1	1	1	11	4	not significant
CASC5	c197247.graph_c0_seq5	1	1	5	4	not significant
STYK1	c199523.graph_c5_seq45	1	1	9	4	not significant
VPS9D1	c191461.graph_c0_seq11	1	1	4	3	not significant
ZNF541	c178124.graph_c0_seq11	1	1	9	3	not significant
ALDH1A1	c203559.graph_c1_seq2	1	1	15	3	not significant
C16ORF78	c193528.graph_c0_seq1	1	1	5	4	not significant
TMEM255B	c196740.graph_c1_seq2	1	1	8	1	not significant
RFX6	c196498.graph_c0_seq35	1	1	10	2	not significant
LSS	c201688.graph_c6_seq13	1	1	6	2	not significant
RTKN2	c201615.graph_c0_seq1	1	1	8	1	not significant
TRIM6	c203218.graph_c0_seq11	1	1	9	4	not significant
HEMGN	c175867.graph_c0_seq2	1	1	7	1	not significant
VAV2	c191624.graph_c0_seq47	1	1	11	2	not significant
PTPRR	c188634.graph_c0_seq8	1	1	11	1	not significant
ANO2	c188913.graph_c0_seq5	1	1	10	2	not significant
ACBD4	c195407.graph_c1_seq43	1	1	9	3	not significant
MMAA	c184134.graph_c1_seq4	1	1	15	2	not significant
LY6E	c203185.graph_c3_seq1	1	1	11	2	not significant
ODAM	c160893.graph_c0_seq1	1	1	4	3	not significant
TTC28	c203103.graph_c1_seq9	1	1	10	2	not significant
CEP120	c197738.graph_c0_seq8	1	1	8	2	not significant
DNAH8	c188126.graph_c0_seq3	1	1	5	9	not significant
TRAIP	c188809.graph_c1_seq1	1	1	10	2	not significant
SDCCAG3	c200068.graph_c2_seq19	1	1	11	3	not significant
DGCR2	c198040.graph_c8_seq3	1	1	12	2	not significant
CCSER2	c193132.graph_c0_seq3	1	1	12	3	not significant
TMEM56	c189796.graph_c0_seq7	1	1	10	1	not significant
AKIP1	c202347.graph_c7_seq7	1	1	5	2	not significant
FAM154A	c266632.graph_c0_seq1	1	1	5	4	not significant
NUSAP1	c167512.graph_c0_seq3	1	1	4	2	not significant
HSP90B1	c190718.graph_c0_seq2	1	1	16	2	not significant
COQ5	c143971.graph_c0_seq1	1	1	15	2	not significant
BIK	c189499.graph_c0_seq6	1	1	4	2	not significant
KLK13	c196503.graph_c0_seq22	1	1	10	1	not significant
LOC718240	c203018.graph_c0_seq4	1	1	15	1	not significant
NUBPL	c203627.graph_c5_seq7	1	1	9	2	not significant
CYP4X1	c184137.graph_c0_seq4	1	1	10	2	not significant
NPFFR2	c183706.graph_c0_seq2	1	1	8	2	not significant
CHML	c183757.graph_c0_seq2	1	1	11	2	not significant
FDXR	c190679.graph_c0_seq34	1	1	11	1	not significant
MTHFD1	c192544.graph_c3_seq6	1	1	15	4	not significant
FASTKD3	c200685.graph_c0_seq6	1	1	9	6	not significant
ZC2HC1B	c186482.graph_c0_seq5	1	1	5	2	not significant
FAM124B	c190958.graph_c0_seq1	1	1	5	7	not significant
METTL8	c192250.graph_c0_seq21	1	1	9	2	not significant
TSPYL5	c199140.graph_c4_seq1	1	1	5	3	not significant
CCDC110	c190466.graph_c0_seq6	1	1	4	6	not significant
SERPINA5	c197793.graph_c9_seq1	1	1	4	3	not significant
TGFBR3	c192575.graph_c1_seq1	1	1	12	2	not significant
SLC7A3	c189220.graph_c0_seq18	1	1	12	1	not significant
TRMT12	c201718.graph_c1_seq2	1	1	11	1	not significant
ACBD4	c195407.graph_c1_seq14	1	1	7	3	not significant
RTDR1	c201529.graph_c0_seq4	1	1	10	2	not significant
EPHX2	c200236.graph_c0_seq3	1	1	14	3	not significant
RABGAP1L	c193475.graph_c0_seq20	1	1	8	2	not significant
GPRIN2	c201955.graph_c0_seq4	1	1	7	2	not significant
MVD	c185851.graph_c0_seq1	1	1	9	1	not significant
SLC35A5	c144909.graph_c0_seq1	1	1	11	1	not significant
P4HA3	c190567.graph_c0_seq18	1	1	9	1	not significant
TOM1_11	c198663.graph_c0_seq38	1	1	13	2	not significant
TCEAL5	c151017.graph_c0_seq4	1	1	9	1	not significant
MLXIPL	c202853.graph_c4_seq16	1	1	5	2	not significant
SPIRE1	c199617.graph_c3_seq15	1	1	9	3	not significant
DDX43	c73163.graph_c0_seq1	1	1	10	4	not significant
POGK	c192388.graph_c0_seq5	1	1	15	1	not significant
MAB21L3	c199465.graph_c2_seq15	1	1	4	3	not significant
MMRN1	c203725.graph_c0_seq3	1	1	4	2	not significant
SPIRE1	c199617.graph_c3_seq2	1	1	7	3	not significant
DCN	c178365.graph_c0_seq3	1	1	14	2	not significant
RNASE12	c289670.graph_c0_seq1	1	1	4	1	not significant
NDUFA7	c196138.graph_c4_seq2	1	1	16	2	not significant
LOC100909893	c169087.graph_c0_seq2	NA	NA	3	26	not significant
SPTBN4	c200557.graph_c4_seq34	NA	NA	9	27	not significant
EPHB4	c195671.graph_c1_seq14	NA	NA	10	13	not significant
LPHN2	c198562.graph_c0_seq31	NA	NA	12	115	not significant
MSN	c202671.graph_c2_seq5	NA	NA	15	0	not significant
MTRF1L	c199566.graph_c0_seq14	NA	NA	13	37	not significant
SLC41A3	c199206.graph_c0_seq12	NA	NA	13	13	not significant
NDST1	c200204.graph_c2_seq1	NA	NA	14	26	not significant
RBAK	c199625.graph_c1_seq9	NA	NA	12	10	not significant
CACNA1H	c202353.graph_c1_seq77	NA	NA	3	7	not significant
FGFR1	c200559.graph_c13_seq50	NA	NA	3	13	not significant
FGFR1	c200559.graph_c13_seq46	NA	NA	14	13	not significant
SLC12A5	c193590.graph_c3_seq77	NA	NA	11	8	not significant
ZNF768	c154136.graph_c0_seq1	NA	NA	7	0	not significant
MAPK14	c187350.graph_c1_seq4	NA	NA	14	7	not significant
PLXNA1	c201584.graph_c4_seq6	NA	NA	9	26	not significant
SOGA1	c202675.graph_c1_seq1	NA	NA	10	1	not significant
KLRD1	c181720.graph_c0_seq6	NA	NA	3	0	not significant
RAPH1	c177023.graph_c1_seq2	NA	NA	7	1	not significant
KCNJ4	c195582.graph_c2_seq2	NA	NA	10	1	not significant
ZEB1	c194962.graph_c0_seq1	NA	NA	3	2	not significant
ZNF282	c201123.graph_c0_seq1	NA	NA	4	9	not significant
EPHB2	c195671.graph_c1_seq31	NA	NA	11	38	not significant
GALNT4	c198603.graph_c0_seq1	NA	NA	10	9	not significant
DDX26B	c182883.graph_c0_seq9	NA	NA	10	3	not significant
PTPN18	c199605.graph_c0_seq5	NA	NA	6	0	not significant
KRT222	c180444.graph_c0_seq2	NA	NA	11	1	not significant
LYPLAL1	c200505.graph_c0_seq1	NA	NA	11	3	not significant
KIAA1109	c202986.graph_c1_seq36	NA	NA	10	3	not significant
PLEC	c200211.graph_c5_seq84	NA	NA	13	5	not significant
HAVCR1	c201872.graph_c0_seq24	NA	NA	3	30	not significant
SPATA17	c194356.graph_c1_seq16	NA	NA	5	1	not significant
USP44	c192211.graph_c5_seq5	NA	NA	8	0	not significant
APLF	c195696.graph_c0_seq9	NA	NA	6	3	not significant
CD8B	c152677.graph_c0_seq3	NA	NA	5	1	not significant
CD8B	c152677.graph_c0_seq1	NA	NA	5	1	not significant
MAP4	c196998.graph_c1_seq87	NA	NA	5	3	not significant
MAP4	c196998.graph_c1_seq140	NA	NA	4	5	not significant
CEP95	c200793.graph_c1_seq8	NA	NA	7	2	not significant
CSTL1	c278000.graph_c0_seq1	NA	NA	5	1	not significant
JPH3	c194307.graph_c0_seq1	NA	NA	11	1	not significant
SGCA	c187520.graph_c2_seq6	NA	NA	11	1	not significant
ZNF280B	c180796.graph_c0_seq4	NA	NA	3	4	not significant
SLC34A1	c162194.graph_c0_seq10	NA	NA	15	1	not significant
SMYD4	c196927.graph_c0_seq2	NA	NA	5	2	not significant
MEP1B	c201085.graph_c0_seq5	NA	NA	10	3	not significant
DDHD2	c199746.graph_c18_seq6	NA	NA	11	1	not significant
NFATC1	c195011.graph_c0_seq1	NA	NA	8	1	not significant
BRCA2_9	c202647.graph_c0_seq22	NA	NA	4	1	not significant
DDX11	c203746.graph_c0_seq33	NA	NA	3	3	not significant
AP1S3	c194822.graph_c0_seq6	NA	NA	12	4	not significant
OR8K5	c203786.graph_c1_seq7	NA	NA	3	3	not significant
2900026A02RIK	c202997.graph_c0_seq7	NA	NA	3	10	not significant
LAT2	c196749.graph_c1_seq17	NA	NA	3	1	not significant
MPDZ	c203073.graph_c2_seq34	NA	NA	4	6	not significant
XPC	c198973.graph_c2_seq23	NA	NA	3	6	not significant
MPDZ	c203073.graph_c2_seq14	NA	NA	3	7	not significant
ESPL1	c201972.graph_c0_seq46	NA	NA	10	4	not significant
KAZN	c193417.graph_c1_seq16	NA	NA	8	1	not significant
DYDC2	c198835.graph_c0_seq17	NA	NA	7	0	not significant
DYDC2	c198835.graph_c0_seq25	NA	NA	7	0	not significant
ARMCX5	c157055.graph_c0_seq2	NA	NA	6	6	not significant
ERCC6	c203378.graph_c0_seq10	NA	NA	10	4	not significant
BTN1A1	c197134.graph_c4_seq64	NA	NA	4	2	not significant
DOCK5	c203605.graph_c0_seq5	NA	NA	11	3	not significant
ZC3H4	c178290.graph_c0_seq9	NA	NA	12	2	not significant
GRIN1	c193976.graph_c0_seq45	NA	NA	13	0	not significant
MAP3K15	c179729.graph_c0_seq2_PART0	NA	NA	5	0	not significant
RHPN1	c202789.graph_c0_seq107	NA	NA	7	3	not significant
NACA_4	c186432.graph_c0_seq2	NA	NA	3	0	not significant
LOC560775	c189037.graph_c0_seq1	NA	NA	6	1	not significant
DHX15	c201179.graph_c4_seq1	NA	NA	16	0	not significant
SIX1	c190280.graph_c0_seq3	NA	NA	13	1	not significant
GNG3	c177797.graph_c0_seq2	NA	NA	15	0	not significant
DPP4	c201829.graph_c6_seq14	NA	NA	14	4	not significant
SACS	c201796.graph_c0_seq4	NA	NA	10	3	not significant
BLZF1	c194019.graph_c1_seq10	NA	NA	14	2	not significant
TEX13A	c153452.graph_c0_seq1	NA	NA	5	3	not significant
SLX4	c197018.graph_c0_seq12	NA	NA	5	0	not significant
IL1R1	c192211.graph_c5_seq16	NA	NA	6	1	not significant
TMEM252	c184469.graph_c0_seq3	NA	NA	8	4	not significant
FTSJ2	c186890.graph_c2_seq7	NA	NA	15	4	not significant
WDR60	c189815.graph_c0_seq4	NA	NA	6	3	not significant
4933427D14RIK	c199884.graph_c0_seq7	NA	NA	3	0	not significant
DCLK3	c189833.graph_c0_seq1	NA	NA	6	0	not significant
KIAA1549	c202700.graph_c2_seq13	NA	NA	6	6	not significant
KIAA1549	c202700.graph_c2_seq12	NA	NA	7	3	not significant
HBS1L	c180335.graph_c1_seq4	NA	NA	5	4	not significant
FILIP1L	c179841.graph_c0_seq3	NA	NA	15	4	not significant
ATP7	c193828.graph_c5_seq1	NA	NA	11	2	not significant
ALKBH7	c201013.graph_c1_seq13_PART0	NA	NA	14	3	not significant
EGFL7	c198072.graph_c0_seq34	NA	NA	5	4	not significant
NEK10	c198693.graph_c2_seq31	NA	NA	9	4	not significant
SERPINI2	c193748.graph_c0_seq3	NA	NA	6	0	not significant
RAPSN	c195254.graph_c0_seq5	NA	NA	4	1	not significant
CA4	c187000.graph_c2_seq3	NA	NA	9	3	not significant
DTX3L	c197508.graph_c7_seq7	NA	NA	5	0	not significant
LOC100652824	c189354.graph_c0_seq4	NA	NA	3	0	not significant
IFNGR1	c194289.graph_c0_seq1	NA	NA	6	0	not significant
INCA1	c199227.graph_c4_seq6	NA	NA	7	3	not significant
SPIDR	c193292.graph_c0_seq12	NA	NA	4	1	not significant
KIF24	c185170.graph_c0_seq5	NA	NA	6	0	not significant
ALDH7A1	c199557.graph_c3_seq26	NA	NA	15	2	not significant
C17ORF74	c170397.graph_c0_seq2	NA	NA	5	0	not significant
ALG10	c202205.graph_c2_seq1	NA	NA	12	3	not significant
CYP2W1	c202423.graph_c0_seq5	NA	NA	9	3	not significant
C11ORF71	c171757.graph_c0_seq2	NA	NA	3	1	not significant
MUC1_3	c190201.graph_c1_seq1	NA	NA	5	0	not significant
GAS8	c198957.graph_c3_seq25	NA	NA	13	3	not significant
CCDC135	c193611.graph_c0_seq1	NA	NA	10	3	not significant
DCLRE1C	c198062.graph_c0_seq5	NA	NA	10	1	not significant
CES3	c180476.graph_c0_seq1	NA	NA	7	1	not significant
ICK	c187743.graph_c0_seq9	NA	NA	12	3	not significant
PUS7L	c195131.graph_c0_seq10	NA	NA	4	0	not significant
ANKZF1	c203216.graph_c2_seq29	NA	NA	4	0	not significant
ZFAND4	c196648.graph_c1_seq6	NA	NA	4	0	not significant
METTL4	c177860.graph_c0_seq4	NA	NA	6	0	not significant
EFHC2	c190918.graph_c2_seq16	NA	NA	9	1	not significant
ZC2HC1C	c202839.graph_c0_seq25	NA	NA	3	2	not significant
FAM170B	c198294.graph_c2_seq6	NA	NA	4	0	not significant
COL7A1	c203620.graph_c1_seq3	NA	NA	10	8	not significant
C3ORF67	c189172.graph_c0_seq1	NA	NA	3	3	not significant
LOC799016	c188844.graph_c0_seq13	NA	NA	3	2	not significant
N4BP2L2	c201844.graph_c0_seq53	NA	NA	7	4	not significant
PMS1_11	c193251.graph_c0_seq27	NA	NA	4	4	not significant
NCAPG2	c199779.graph_c1_seq19	NA	NA	10	2	not significant
CENPC	c187973.graph_c0_seq4	NA	NA	6	2	not significant
EMILIN1	c190741.graph_c0_seq6	NA	NA	11	2	not significant
DPP10	c198581.graph_c0_seq9	NA	NA	12	3	not significant
SLCO6A1	c155430.graph_c0_seq1	NA	NA	4	0	not significant
DPP10	c198581.graph_c0_seq14	NA	NA	12	3	not significant
DPP10	c198581.graph_c0_seq16	NA	NA	12	3	not significant
HMGCS1	c177789.graph_c0_seq1	NA	NA	14	3	not significant
DPP10	c198581.graph_c0_seq6	NA	NA	12	3	not significant
CYB561D2	c185818.graph_c2_seq12	NA	NA	16	2	not significant
DPP10	c198581.graph_c0_seq10	NA	NA	12	3	not significant
CCDC110	c200630.graph_c2_seq1	NA	NA	4	4	not significant
POM121L12	c273039.graph_c0_seq1	NA	NA	3	0	not significant
UBE2K	c179209.graph_c0_seq2	NA	NA	14	0	not significant
STK11IP	c199031.graph_c0_seq128	NA	NA	4	0	not significant
CD164	c176721.graph_c0_seq1	NA	NA	8	0	not significant
CSPP1	c200728.graph_c6_seq1	NA	NA	14	2	not significant
SLC5A9	c196147.graph_c0_seq39	NA	NA	8	0	not significant
TSHR	c169478.graph_c0_seq4	NA	NA	10	0	not significant
C15ORF38	c202843.graph_c0_seq1	NA	NA	12	1	not significant
OCEL1	c171619.graph_c0_seq12	NA	NA	6	3	not significant
APOOL	c181404.graph_c0_seq5	NA	NA	10	3	not significant
BORA	c200784.graph_c0_seq8	NA	NA	5	0	not significant
SSX2IP	c198352.graph_c0_seq3	NA	NA	14	2	not significant
PTGS2	c192400.graph_c0_seq2	NA	NA	10	0	not significant
PMS1_11	c193251.graph_c0_seq10	NA	NA	9	3	not significant
ANKRD61	c156011.graph_c0_seq1	NA	NA	4	1	not significant
CHD9	c199241.graph_c0_seq25	NA	NA	12	3	not significant
MISP	c202978.graph_c1_seq20	NA	NA	4	0	not significant
KLHL33	c189107.graph_c0_seq10	NA	NA	7	1	not significant
RNF8	c191392.graph_c3_seq8	NA	NA	12	0	not significant
REXO1	c195890.graph_c0_seq29	NA	NA	10	2	not significant
CCDC64B	c190722.graph_c0_seq5	NA	NA	11	2	not significant
GM4758	c198086.graph_c0_seq2	NA	NA	4	1	not significant
ENDOD1	c191886.graph_c0_seq1	NA	NA	13	1	not significant
CARF	c201674.graph_c0_seq52	NA	NA	7	0	not significant
IQCC	c193117.graph_c0_seq14	NA	NA	5	0	not significant
CCDC9	c182293.graph_c2_seq14	NA	NA	6	0	not significant
ERMN	c193890.graph_c0_seq3	NA	NA	3	3	not significant
ANLN	c193930.graph_c0_seq1	NA	NA	11	7	not significant
TMEM253	c185323.graph_c0_seq7	NA	NA	9	0	not significant
HIVEP2	c201324.graph_c0_seq3	NA	NA	13	7	not significant
PANX1	c181559.graph_c0_seq1	NA	NA	11	0	not significant
C16ORF59	c199284.graph_c3_seq4	NA	NA	4	0	not significant
METTL25	c191835.graph_c1_seq13	NA	NA	8	0	not significant
CCDC71	c202980.graph_c0_seq1	NA	NA	9	0	not significant
TMEM220	c201653.graph_c0_seq1	NA	NA	10	2	not significant
C9ORF152	c193640.graph_c1_seq17	NA	NA	7	0	not significant
GPRASP1	c188717.graph_c0_seq5	NA	NA	5	9	not significant
COQ2	c199409.graph_c5_seq33	NA	NA	12	1	not significant
CCDC77	c199621.graph_c0_seq20	NA	NA	5	0	not significant
TIMM8A	c165892.graph_c0_seq1	NA	NA	3	0	not significant
MLANA	c76562.graph_c0_seq1	NA	NA	7	2	not significant
AHSP	c202215.graph_c3_seq1	NA	NA	10	2	not significant
C7ORF62	c159039.graph_c0_seq2	NA	NA	7	2	not significant
TEX26	c156703.graph_c0_seq3	NA	NA	4	0	not significant
STBD1	c195912.graph_c1_seq4	NA	NA	8	0	not significant
ALDH7A1	c199557.graph_c3_seq32	NA	NA	10	2	not significant
GPR1	c174777.graph_c0_seq2	NA	NA	11	2	not significant
CDH24	c201396.graph_c5_seq1	NA	NA	11	2	not significant
CXCL17	c164946.graph_c0_seq2	NA	NA	7	0	not significant
DCLRE1B	c183420.graph_c0_seq3	NA	NA	7	1	not significant
SGPP1	c169031.graph_c1_seq1	NA	NA	7	2	not significant
FBXO40	c167788.graph_c0_seq5	NA	NA	9	1	not significant
SPA17	c147695.graph_c0_seq1	NA	NA	7	2	not significant
FAM26D	c194830.graph_c0_seq1	NA	NA	5	0	not significant
MAPT	c199672.graph_c4_seq20	NA	NA	13	2	not significant
YARS	c201174.graph_c1_seq8	NA	NA	15	2	not significant
FLNC	c202879.graph_c1_seq14	NA	NA	10	1	not significant
GPC2	c194775.graph_c0_seq10	NA	NA	10	2	not significant
ANKRD45	c202573.graph_c0_seq3	NA	NA	12	2	not significant
MAPT	c199672.graph_c4_seq33	NA	NA	14	2	not significant
GCNT7	c141802.graph_c1_seq2	NA	NA	4	1	not significant
LRRC27	c198998.graph_c4_seq38	NA	NA	4	3	not significant
MAPT	c199672.graph_c4_seq23	NA	NA	14	2	not significant
MAPT	c199672.graph_c4_seq34	NA	NA	14	2	not significant
C2ORF43	c201896.graph_c0_seq3	NA	NA	8	0	not significant
AZGP1	c154232.graph_c0_seq1	NA	NA	9	0	not significant
MAPT	c199672.graph_c4_seq31	NA	NA	14	2	not significant
STAU1_6	c184173.graph_c0_seq5	NA	NA	16	2	not significant
SNTB1	c190908.graph_c0_seq1	NA	NA	8	0	not significant
DCUN1D2	c201038.graph_c0_seq10	NA	NA	12	1	not significant
GPBP1L1	c201581.graph_c4_seq47	NA	NA	15	1	not significant
GPR146	c172965.graph_c0_seq1	NA	NA	15	2	not significant
FAM26D	c194830.graph_c0_seq3	NA	NA	3	0	not significant
DTNBB	c197948.graph_c1_seq36	NA	NA	15	2	not significant
PLEKHM3	c198215.graph_c0_seq12	NA	NA	12	2	not significant
SORBS1	c201941.graph_c0_seq30	NA	NA	10	1	not significant
DTNBB	c197948.graph_c1_seq29	NA	NA	15	2	not significant
DTNBB	c197948.graph_c1_seq25	NA	NA	15	2	not significant
LPCAT2	c198268.graph_c0_seq2	NA	NA	9	2	not significant
PGM3	c196095.graph_c10_seq3	NA	NA	12	0	not significant
ACY1	c200741.graph_c7_seq31	NA	NA	14	1	not significant
SYT5	c197256.graph_c1_seq8	NA	NA	14	1	not significant
RNMTL1	c194567.graph_c4_seq11	NA	NA	15	1	not significant
TNFSF8	c177548.graph_c0_seq3	NA	NA	5	1	not significant
ADC	c201531.graph_c1_seq11	NA	NA	10	0	not significant
ARHGAP32	c197131.graph_c3_seq28	NA	NA	12	1	not significant
DCLRE1C	c198062.graph_c0_seq15	NA	NA	7	1	not significant
CPQ	c198833.graph_c2_seq1	NA	NA	14	0	not significant
LIAS	c183988.graph_c0_seq10	NA	NA	10	2	not significant
LTK	c195754.graph_c0_seq45	NA	NA	3	2	not significant
IL2RA	c158321.graph_c0_seq2	NA	NA	6	2	not significant
IGSF1	c192333.graph_c0_seq12	NA	NA	4	0	not significant
LIAS	c183988.graph_c0_seq8	NA	NA	10	2	not significant
ANKRD2	c156571.graph_c0_seq5	NA	NA	11	2	not significant
PLIN1	c198513.graph_c1_seq13	NA	NA	3	2	not significant
CLUAP1	c200335.graph_c6_seq3	NA	NA	12	2	not significant
CCL24	c141155.graph_c0_seq1	NA	NA	6	0	not significant
DAO	c174829.graph_c0_seq3	NA	NA	15	1	not significant
MTMR1	c176672.graph_c1_seq11	NA	NA	12	1	not significant
LTK	c195754.graph_c0_seq15	NA	NA	3	2	not significant
LTK	c195754.graph_c0_seq88	NA	NA	3	2	not significant
NUP50	c198611.graph_c0_seq9	NA	NA	4	0	not significant
ERMP1	c195041.graph_c0_seq1	NA	NA	5	2	not significant
XKR9	c186888.graph_c0_seq1	NA	NA	9	0	not significant
SORBS1	c201941.graph_c0_seq17	NA	NA	10	1	not significant
RNASE10	c180383.graph_c0_seq1	NA	NA	7	0	not significant
SMLR1_3	c184084.graph_c1_seq2	NA	NA	6	1	not significant
SORBS1	c201941.graph_c0_seq6	NA	NA	9	1	not significant
EDA	c199040.graph_c0_seq7	NA	NA	10	1	not significant
MED17	c194958.graph_c2_seq1	NA	NA	12	1	not significant
PCDHAC2	c197824.graph_c2_seq7	NA	NA	10	2	not significant
THRB	c195906.graph_c0_seq1	NA	NA	13	2	not significant
ART5	c193439.graph_c1_seq12	NA	NA	10	2	not significant
PEX7	c194896.graph_c10_seq1	NA	NA	13	2	not significant
ACPP	c200793.graph_c2_seq1	NA	NA	9	0	not significant
MTERF	c193792.graph_c0_seq39	NA	NA	7	1	not significant
EIF4EBP3	c194995.graph_c1_seq15	NA	NA	15	2	not significant
ACPP	c200793.graph_c2_seq13	NA	NA	9	0	not significant
AWAT2	c202037.graph_c4_seq1	NA	NA	11	0	not significant
IDS	c173720.graph_c0_seq8	NA	NA	10	1	not significant
TMEM192	c194776.graph_c0_seq7	NA	NA	5	2	not significant
ACE2	c184174.graph_c0_seq1	NA	NA	13	0	not significant
WDR53	c187381.graph_c4_seq5	NA	NA	13	1	not significant
CHST10	c198609.graph_c0_seq1	NA	NA	12	1	not significant
LANCL1	c191167.graph_c0_seq2	NA	NA	14	1	not significant
CTSC	c203374.graph_c4_seq2	NA	NA	16	2	not significant
ABHD14B	c199283.graph_c0_seq11	NA	NA	15	1	not significant
WWOX	c199724.graph_c1_seq9	NA	NA	14	2	not significant
MEGF9	c184104.graph_c0_seq3	NA	NA	6	2	not significant
PPRC1	c201014.graph_c0_seq59	NA	NA	5	7	not significant
FSIP1	c190897.graph_c0_seq8	NA	NA	5	0	not significant
RAD51C	c170511.graph_c0_seq1	NA	NA	9	0	not significant
SCARB1	c191915.graph_c0_seq2	NA	NA	15	3	not significant
PHF1	c195927.graph_c0_seq39	NA	NA	13	2	not significant
C12ORF43	c198899.graph_c1_seq13	NA	NA	6	2	not significant
PHF1	c195927.graph_c0_seq22	NA	NA	13	2	not significant
RASSF6	c196930.graph_c1_seq44	NA	NA	4	2	not significant
MTMR7	c184115.graph_c0_seq6	NA	NA	11	2	not significant
RABAC1	c170708.graph_c0_seq1	NA	NA	14	2	not significant
RB1CC1	c192159.graph_c1_seq5	NA	NA	12	2	not significant
RSPO1	c193328.graph_c0_seq22	NA	NA	11	2	not significant
VSTM4	c202971.graph_c0_seq25	NA	NA	3	2	not significant
MYO18B	c197321.graph_c0_seq1	NA	NA	10	8	not significant
LEPRE1	c196628.graph_c0_seq36	NA	NA	11	1	not significant
ST8SIA6	c199550.graph_c0_seq10	NA	NA	8	0	not significant
STK35	c188952.graph_c1_seq2	NA	NA	9	2	not significant
PKN1	c200375.graph_c2_seq6	NA	NA	14	1	not significant
TCTE1	c252457.graph_c0_seq1	NA	NA	3	0	not significant
TEX40	c187533.graph_c2_seq9	NA	NA	5	0	not significant
AMICA1	c197719.graph_c0_seq4	NA	NA	3	1	not significant
CDH15	c188050.graph_c0_seq6	NA	NA	5	1	not significant
ZNF667	c203727.graph_c0_seq40	NA	NA	7	0	not significant
TNIP1	c179431.graph_c0_seq9	NA	NA	3	3	not significant
HEXB	c156625.graph_c1_seq1	NA	NA	10	1	not significant
CHID1	c190230.graph_c1_seq6	NA	NA	15	2	not significant
ARHGAP24	c194151.graph_c1_seq9	NA	NA	14	2	not significant
ZYX	c200430.graph_c2_seq49	NA	NA	13	0	not significant
GPR153	c195163.graph_c1_seq11	NA	NA	6	2	not significant
RHBDD2	c154530.graph_c0_seq1	NA	NA	14	1	not significant
LEPRE1	c196628.graph_c0_seq12	NA	NA	12	1	not significant
ASPH	c196348.graph_c1_seq10	NA	NA	5	2	not significant
CG11710	c201132.graph_c2_seq23	NA	NA	14	1	not significant
ASPH	c196348.graph_c1_seq21	NA	NA	5	2	not significant
PHYKPL	c201500.graph_c2_seq61	NA	NA	9	0	not significant
ABHD16B	c186177.graph_c0_seq13	NA	NA	10	1	not significant
IGSF21	c195149.graph_c1_seq16	NA	NA	12	1	not significant
ASPH	c154667.graph_c0_seq2	NA	NA	5	2	not significant
BNC1	c158546.graph_c0_seq2	NA	NA	13	1	not significant
GOLT1A	c186651.graph_c2_seq2	NA	NA	12	1	not significant
ADCK2	c193698.graph_c2_seq3	NA	NA	5	0	not significant
HFM1	c200674.graph_c1_seq36	NA	NA	8	1	not significant
PARP3	c200020.graph_c0_seq30	NA	NA	7	0	not significant
TULP2	c182784.graph_c0_seq18	NA	NA	3	0	not significant
SFRP1	c183908.graph_c0_seq1	NA	NA	12	0	not significant
MYO19	c201736.graph_c1_seq96	NA	NA	4	0	not significant
TCHP	c202003.graph_c0_seq58	NA	NA	12	1	not significant
TEX43	c197571.graph_c1_seq13	NA	NA	6	3	not significant
ENKUR	c175625.graph_c0_seq1	NA	NA	11	1	not significant
CRADD	c175759.graph_c0_seq1	NA	NA	11	2	not significant
GUCY1B3	c200927.graph_c7_seq4	NA	NA	15	2	not significant
CCDC120	c194702.graph_c2_seq1	NA	NA	10	1	not significant
MRAP2	c173019.graph_c0_seq3	NA	NA	13	1	not significant
TJAP1	c189024.graph_c0_seq38	NA	NA	10	2	not significant
COL8A2	c191000.graph_c0_seq2	NA	NA	11	0	not significant
SLC39A5	c195129.graph_c9_seq37	NA	NA	15	1	not significant
C7ORF61	c188756.graph_c0_seq4	NA	NA	3	0	not significant
C19ORF25	c193344.graph_c0_seq3	NA	NA	8	2	not significant
CG10361	c184147.graph_c0_seq6	NA	NA	15	1	not significant
CCDC160	c169228.graph_c0_seq1	NA	NA	3	0	not significant
MAN2C1	c202946.graph_c2_seq98	NA	NA	12	1	not significant
CHD5	c188407.graph_c0_seq3	NA	NA	10	1	not significant
OGFR	c202664.graph_c0_seq116	NA	NA	6	2	not significant
F2RL1	c195625.graph_c5_seq15	NA	NA	11	1	not significant
GPR83	c170327.graph_c1_seq1	NA	NA	12	2	not significant
EFNA2	c177821.graph_c0_seq3	NA	NA	12	1	not significant
KRCC1	c150072.graph_c0_seq1	NA	NA	11	1	not significant
CLCN6	c203484.graph_c0_seq38	NA	NA	10	1	not significant
SLC2A8	c194552.graph_c1_seq14	NA	NA	7	2	not significant
C9ORF89	c198177.graph_c1_seq12	NA	NA	12	1	not significant
CLMN	c201283.graph_c0_seq3	NA	NA	5	0	not significant
SEMA3G	c183456.graph_c0_seq5	NA	NA	3	0	not significant
EME1	c203298.graph_c1_seq1	NA	NA	4	0	not significant
TXNL4A	c202015.graph_c0_seq3	NA	NA	15	0	not significant
NIPSNAP3A	c200545.graph_c1_seq2	NA	NA	14	1	not significant
NRP2	c189245.graph_c1_seq1	NA	NA	11	1	not significant
TIMP3	c176543.graph_c0_seq1	NA	NA	17	0	not significant
MTFR2	c182516.graph_c0_seq6	NA	NA	3	0	not significant
RASL11B	c282574.graph_c0_seq1	NA	NA	4	1	not significant
RNASEL	c197284.graph_c0_seq3	NA	NA	5	2	not significant
SLC12A1	c196816.graph_c0_seq11	NA	NA	13	1	not significant
IRF2	c192011.graph_c0_seq1	NA	NA	16	2	not significant
MYZAP	c158267.graph_c0_seq1	NA	NA	14	2	not significant
CHRNA4	c174288.graph_c0_seq3	NA	NA	6	3	not significant
TM7SF3	c198820.graph_c4_seq28	NA	NA	13	0	not significant
PSMB8	c201789.graph_c1_seq5	NA	NA	3	0	not significant
MFSD3	c203733.graph_c0_seq102	NA	NA	9	1	not significant
C1ORF54	c189206.graph_c0_seq6	NA	NA	3	0	not significant
TTC26	c203539.graph_c3_seq2	NA	NA	4	1	not significant
RNLS	c193040.graph_c1_seq13	NA	NA	8	0	not significant
CFD	c201194.graph_c6_seq1	NA	NA	3	2	not significant
TMEM236	c191755.graph_c0_seq18	NA	NA	10	0	not significant
SCARB1	c191915.graph_c0_seq3	NA	NA	10	3	not significant
F13A1	c174894.graph_c0_seq4	NA	NA	12	2	not significant
PPP1R15A	c200179.graph_c0_seq1	NA	NA	4	5	not significant
SLC39A1_9	c290267.graph_c0_seq1	NA	NA	14	1	not significant
LOC102639117	c145691.graph_c0_seq1	NA	NA	6	1	not significant
ASS1	c174323.graph_c1_seq3	NA	NA	16	2	not significant
CHTF18	c200385.graph_c1_seq1	NA	NA	9	2	not significant
ADAD2	c193190.graph_c0_seq22	NA	NA	4	0	not significant
SURF2	c154228.graph_c0_seq1	NA	NA	9	0	not significant
SURF2	c154228.graph_c0_seq4	NA	NA	9	0	not significant
KATNAL2	c201284.graph_c0_seq59	NA	NA	10	0	not significant
ANKRD42	c188226.graph_c0_seq2	NA	NA	9	1	not significant
GPALPP1	c204540.graph_c0_seq1	NA	NA	7	0	not significant
FAM160A2	c194902.graph_c2_seq48	NA	NA	13	1	not significant
CXORF36	c190560.graph_c1_seq2	NA	NA	4	0	not significant
FASTKD1	c200798.graph_c9_seq28	NA	NA	4	0	not significant
FER1L6	c202502.graph_c0_seq33	NA	NA	9	3	not significant
FSD1	c182532.graph_c0_seq4	NA	NA	12	2	not significant
FAM160A2	c194902.graph_c2_seq11	NA	NA	13	1	not significant
COLQ	c195542.graph_c0_seq4	NA	NA	6	0	not significant
APLP1	c193378.graph_c9_seq1	NA	NA	11	2	not significant
FAM110A	c201804.graph_c0_seq5	NA	NA	10	0	not significant
RBFOX2	c194110.graph_c2_seq58	NA	NA	13	1	not significant
MAVS	c201065.graph_c9_seq55	NA	NA	5	0	not significant
CEP170B	c201391.graph_c1_seq10	NA	NA	4	0	not significant
ATRIP	c189851.graph_c0_seq2	NA	NA	11	1	not significant
KLHL9	c158819.graph_c0_seq4	NA	NA	14	8	not significant
RBFOX2	c194110.graph_c2_seq62	NA	NA	12	1	not significant
CCDC19	c194711.graph_c0_seq65	NA	NA	11	2	not significant
BCL6B	c183243.graph_c0_seq1	NA	NA	11	0	not significant
CEP170B	c201391.graph_c1_seq17	NA	NA	4	0	not significant
JRK	c203385.graph_c0_seq2	NA	NA	12	2	not significant
PPM1F	c198473.graph_c0_seq9	NA	NA	10	3	not significant
LRRC29	c189972.graph_c0_seq16	NA	NA	4	1	not significant
ZADH2	c154777.graph_c1_seq1	NA	NA	12	0	not significant
ATRIP	c189851.graph_c0_seq5	NA	NA	8	1	not significant
FAM213A	c175075.graph_c0_seq1	NA	NA	13	0	not significant
RASSF7	c177685.graph_c0_seq15	NA	NA	11	0	not significant
PHC3	c199102.graph_c5_seq7	NA	NA	14	1	not significant
SPDL1	c203439.graph_c0_seq26	NA	NA	8	0	not significant
MUTYH	c199218.graph_c0_seq8_PART0	NA	NA	8	0	not significant
CEP68	c198081.graph_c1_seq6	NA	NA	5	0	not significant
C6ORF52	c178425.graph_c0_seq1	NA	NA	3	0	not significant
CCNDBP1	c193908.graph_c1_seq7	NA	NA	7	0	not significant
TMEM17	c194793.graph_c4_seq2	NA	NA	14	0	not significant
UBE2T	c143869.graph_c0_seq1	NA	NA	14	0	not significant
INHA	c162376.graph_c1_seq1	NA	NA	14	0	not significant
TSSC4	c164188.graph_c0_seq3	NA	NA	7	1	not significant
BAG4_11	c193965.graph_c2_seq8	NA	NA	3	1	not significant
IL11RA	c199726.graph_c17_seq11	NA	NA	14	1	not significant
RIC8B	c202964.graph_c0_seq1	NA	NA	14	0	not significant
TARS2	c194737.graph_c4_seq39	NA	NA	3	1	not significant
LAMTOR3	c142879.graph_c2_seq2	NA	NA	17	1	not significant
RNF24	c192324.graph_c0_seq15	NA	NA	9	1	not significant
TSC22D1	c211861.graph_c0_seq1	NA	NA	15	1	not significant
GATC	c187146.graph_c0_seq7	NA	NA	9	1	not significant
EXTL2	c184184.graph_c0_seq15	NA	NA	4	0	not significant
SP1	c139078.graph_c0_seq2	NA	NA	12	1	not significant
SEC11A	c108044.graph_c0_seq2	NA	NA	12	1	not significant
EPYC	c266461.graph_c0_seq1	NA	NA	9	1	not significant
DTHD1	c201296.graph_c0_seq12	NA	NA	9	1	not significant
SLC17A5	c199005.graph_c2_seq5	NA	NA	12	1	not significant
FAM53C	c195674.graph_c0_seq4	NA	NA	14	0	not significant
GBP7	c202623.graph_c1_seq3	NA	NA	8	0	not significant
FAM178B	c176436.graph_c0_seq3	NA	NA	4	0	not significant
GSK3B	c197053.graph_c6_seq3	NA	NA	14	1	not significant
GPR97	c198551.graph_c0_seq13	NA	NA	8	0	not significant
CXCL16	c202108.graph_c2_seq10	NA	NA	4	1	not significant
ASPDH	c192189.graph_c1_seq21	NA	NA	12	0	not significant
SIK2	c183793.graph_c0_seq2	NA	NA	13	0	not significant
GATA1	c267018.graph_c0_seq1	NA	NA	6	0	not significant
PIGM	c207140.graph_c0_seq1	NA	NA	14	1	not significant
HBEGF	c195285.graph_c0_seq6	NA	NA	11	0	not significant
COMMD10	c200647.graph_c0_seq11	NA	NA	15	1	not significant
SPHK2	c192772.graph_c1_seq2	NA	NA	10	1	not significant
CLRN3	c155140.graph_c1_seq1	NA	NA	14	0	not significant
AIMP2	c199575.graph_c5_seq12	NA	NA	13	1	not significant
NEIL1	c194036.graph_c1_seq10	NA	NA	9	1	not significant
RABEPK	c189369.graph_c2_seq26	NA	NA	3	0	not significant
HN1L	c311603.graph_c0_seq1	NA	NA	14	1	not significant
CCDC77	c199621.graph_c0_seq11	NA	NA	10	0	not significant
TOMM40L	c194717.graph_c0_seq6	NA	NA	15	1	not significant
NSFL1C	c171939.graph_c0_seq1	NA	NA	4	1	not significant
GIMAP6	c199528.graph_c0_seq3	NA	NA	5	1	not significant
REM2	c189191.graph_c0_seq8	NA	NA	11	1	not significant
COMMD9	c193322.graph_c2_seq1	NA	NA	15	0	not significant
VKORC1	c179922.graph_c1_seq1	NA	NA	11	0	not significant
CMSS1	c183104.graph_c1_seq2	NA	NA	12	1	not significant
MPLKIP	c196510.graph_c0_seq3	NA	NA	14	1	not significant
BNIP1	c195464.graph_c5_seq2	NA	NA	16	1	not significant
PEBP4	c189346.graph_c0_seq8	NA	NA	5	1	not significant
ALAS2	c198371.graph_c3_seq5	NA	NA	11	1	not significant
SGCG	c156043.graph_c0_seq3	NA	NA	13	1	not significant
RPH3A	c197099.graph_c2_seq74	NA	NA	10	1	not significant
PHKA2	c198071.graph_c1_seq39	NA	NA	12	1	not significant
NEIL1	c194036.graph_c1_seq33	NA	NA	9	1	not significant
NEGR1	c182056.graph_c0_seq1	NA	NA	13	1	not significant
TMEM182	c169800.graph_c1_seq1	NA	NA	10	0	not significant
SLC25A21	c198353.graph_c0_seq3	NA	NA	5	0	not significant
LRRC42	c188628.graph_c2_seq4	NA	NA	15	1	not significant
GHITM	c171279.graph_c0_seq2	NA	NA	16	1	not significant
BCDIN3D	c191792.graph_c1_seq14	NA	NA	12	1	not significant
GCLC	c193856.graph_c4_seq18	NA	NA	3	1	not significant
ACOT8	c169270.graph_c0_seq1	NA	NA	15	0	not significant
LRFN4	c169694.graph_c0_seq1	NA	NA	15	1	not significant
CMTM6	c164714.graph_c0_seq1	NA	NA	13	1	not significant
ACBD3	c166348.graph_c0_seq2	NA	NA	15	1	not significant
ARPP21	c203308.graph_c1_seq18	NA	NA	5	1	not significant
C1ORF86	c197627.graph_c1_seq5	NA	NA	6	0	not significant
PKHD1	c201682.graph_c0_seq55	NA	NA	5	5	not significant
XYLB	c197614.graph_c0_seq2	NA	NA	12	1	not significant
SRL	c196773.graph_c0_seq5	NA	NA	8	1	not significant
PPP2R1B	c190833.graph_c0_seq5	NA	NA	9	0	not significant
KCNAB3	c195896.graph_c1_seq80	NA	NA	11	1	not significant
NAA60	c184031.graph_c1_seq4	NA	NA	15	1	not significant
LSMEM1	c157081.graph_c0_seq2	NA	NA	10	1	not significant
CYB5D2	c199965.graph_c4_seq2	NA	NA	10	0	not significant
TSC22D1	c178927.graph_c2_seq2	NA	NA	12	0	not significant
C1ORF234	c109692.graph_c0_seq1	NA	NA	3	1	not significant
UTP14A	c192339.graph_c0_seq3	NA	NA	9	0	not significant
SERPINB11	c201611.graph_c1_seq7	NA	NA	7	0	not significant
RPUSD4	c200910.graph_c8_seq32	NA	NA	3	1	not significant
ATL3	c183951.graph_c1_seq8	NA	NA	12	1	not significant
C1ORF100	c517236.graph_c0_seq1	NA	NA	4	1	not significant
ATP5O	c160999.graph_c0_seq1	NA	NA	15	1	not significant
ATP13A1	c197833.graph_c0_seq3	NA	NA	11	1	not significant
SEPSECS	c195229.graph_c0_seq19	NA	NA	12	0	not significant
DNAJB2	c176794.graph_c0_seq3	NA	NA	8	0	not significant
ZNF641	c196974.graph_c0_seq4	NA	NA	11	0	not significant
MTIF3	c183325.graph_c0_seq9	NA	NA	8	1	not significant
SLC37A1	c199631.graph_c2_seq16	NA	NA	10	2	not significant
C11ORF74	c201312.graph_c1_seq2	NA	NA	7	1	not significant
LOC365839	c188898.graph_c1_seq2	NA	NA	15	0	not significant
RNF135	c186735.graph_c0_seq6	NA	NA	5	1	not significant
ALKBH1	c193273.graph_c0_seq8	NA	NA	14	0	not significant
KCNMB3	c196525.graph_c0_seq3	NA	NA	5	0	not significant
KCNMB3	c196525.graph_c0_seq19	NA	NA	5	0	not significant
ATP9A	c198698.graph_c0_seq1	NA	NA	13	1	not significant
MANF	c159481.graph_c0_seq1	NA	NA	14	1	not significant
T06D8.9	c194692.graph_c0_seq1	NA	NA	7	0	not significant
METTL20	c190347.graph_c0_seq2	NA	NA	9	0	not significant
ATP6V0E1	c204191.graph_c0_seq1	NA	NA	16	1	not significant
CCDC126	c158489.graph_c0_seq1	NA	NA	14	1	not significant
IL1RN	c171076.graph_c0_seq2	NA	NA	3	0	not significant
TEN1	c187099.graph_c0_seq5	NA	NA	7	1	not significant
PDCD2L	c187849.graph_c0_seq4	NA	NA	8	1	not significant
EPB41	c196679.graph_c0_seq13	NA	NA	11	1	not significant
NTPCR	c200442.graph_c0_seq3	NA	NA	12	1	not significant
WARS2	c176424.graph_c1_seq4	NA	NA	10	0	not significant
WTAP	c200175.graph_c1_seq25	NA	NA	3	0	not significant
SYAP1	c202284.graph_c9_seq2	NA	NA	14	1	not significant
TMEM62	c193908.graph_c1_seq10	NA	NA	9	0	not significant
TMUB1	c204704.graph_c0_seq1	NA	NA	4	1	not significant
YBX3	c193147.graph_c4_seq1	NA	NA	7	0	not significant
TEFM	c177055.graph_c0_seq6	NA	NA	9	1	not significant
PTPRR	c188634.graph_c0_seq1	NA	NA	12	1	not significant
BSN	c197108.graph_c0_seq9	NA	NA	10	10	not significant
PMPCB	c200929.graph_c5_seq2	NA	NA	15	1	not significant
CYP2E1	c74532.graph_c0_seq1	NA	NA	13	0	not significant
ZBTB8A	c199873.graph_c3_seq13	NA	NA	12	1	not significant
ZW10	c203346.graph_c7_seq6	NA	NA	15	0	not significant
NABP1	c197421.graph_c1_seq1	NA	NA	10	0	not significant
C2ORF66	c187658.graph_c0_seq5	NA	NA	3	0	not significant
SYVN1	c187690.graph_c1_seq10	NA	NA	13	1	not significant
MED11	c168676.graph_c0_seq1	NA	NA	16	1	not significant
DHRS7B	c201645.graph_c4_seq3	NA	NA	15	0	not significant
FOXN2	c190415.graph_c1_seq1	NA	NA	12	1	not significant
ZDHHC9	c192958.graph_c14_seq2	NA	NA	13	1	not significant
SYVN1	c187690.graph_c1_seq6	NA	NA	13	1	not significant
ERBB3	c188483.graph_c0_seq8	NA	NA	11	1	not significant
CEP120	c197738.graph_c0_seq4	NA	NA	14	0	not significant
CACNB4	c194125.graph_c0_seq22	NA	NA	13	1	not significant
CDC20	c185108.graph_c0_seq25	NA	NA	14	1	not significant
ZNF641	c196974.graph_c0_seq1	NA	NA	9	0	not significant
PECR	c202620.graph_c5_seq17	NA	NA	10	0	not significant
CLDN10	c189120.graph_c0_seq8	NA	NA	12	1	not significant
KCNAB1	c197040.graph_c0_seq4	NA	NA	12	1	not significant
RPS26	c74066.graph_c0_seq1	NA	NA	15	0	not significant
RRM1	c189571.graph_c0_seq1	NA	NA	14	1	not significant
CDK17	c196897.graph_c0_seq12	NA	NA	15	1	not significant
CDK5	c170341.graph_c2_seq4	NA	NA	16	1	not significant
SFT2D2	c199177.graph_c1_seq3	NA	NA	14	0	not significant
CDKL1	c189167.graph_c0_seq8	NA	NA	15	0	not significant
CCDC51	c162034.graph_c0_seq4	NA	NA	13	0	not significant
ARL2BP	c200915.graph_c3_seq4	NA	NA	14	1	not significant
C10ORF107	c192287.graph_c1_seq7	NA	NA	5	1	not significant
C1QTNF7	c185019.graph_c0_seq1	NA	NA	11	1	not significant
SNX15	c194026.graph_c0_seq16	NA	NA	13	0	not significant
RGS5	c187473.graph_c1_seq1	NA	NA	16	1	not significant
CDK17	c196897.graph_c0_seq3	NA	NA	15	1	not significant
SERTAD4	c192318.graph_c0_seq4	NA	NA	11	1	not significant
ACBD6	c193114.graph_c1_seq5	NA	NA	14	1	not significant
NIN	c203070.graph_c0_seq17	NA	NA	5	4	not significant
EEF1D	c184371.graph_c0_seq2	NA	NA	14	1	not significant
TRHDE	c201543.graph_c0_seq8	NA	NA	9	1	not significant
FCER1A	c185342.graph_c0_seq1	NA	NA	4	0	not significant
ADAMTS1	c184093.graph_c0_seq2	NA	NA	13	1	not significant
TAF11	c187041.graph_c0_seq3	NA	NA	15	1	not significant
HAX1	c198344.graph_c3_seq22	NA	NA	8	0	not significant
MEDAG	c205105.graph_c0_seq1	NA	NA	10	1	not significant
RAB30	c199989.graph_c3_seq6	NA	NA	14	1	not significant
RNF215	c191179.graph_c0_seq1	NA	NA	10	0	not significant
EEF1D	c172565.graph_c0_seq4	NA	NA	13	1	not significant
CPT2	c183770.graph_c0_seq1	NA	NA	15	1	not significant
RNF128A	c165275.graph_c1_seq1	NA	NA	11	1	not significant
LOC365778	c172431.graph_c0_seq1	NA	NA	15	1	not significant
HIBCH	c199267.graph_c0_seq27	NA	NA	13	1	not significant
NUDCD1	c195527.graph_c1_seq25	NA	NA	11	1	not significant
TNFRSF18	c186597.graph_c0_seq7	NA	NA	6	1	not significant
SLCO4A1	c194679.graph_c1_seq9	NA	NA	10	1	not significant
SWI5	c201331.graph_c1_seq2	NA	NA	4	1	not significant
TMX4	c179391.graph_c0_seq1	NA	NA	12	1	not significant
DGCR14	c194324.graph_c1_seq3	NA	NA	14	0	not significant
ITM2A	c204879.graph_c0_seq1	NA	NA	15	1	not significant
PPP6R3	c191108.graph_c1_seq10	NA	NA	13	1	not significant
PTGR1	c201368.graph_c2_seq3	NA	NA	14	0	not significant
C2ORF76	c202044.graph_c1_seq24	NA	NA	14	1	not significant
PPP6R3	c191108.graph_c1_seq9	NA	NA	12	1	not significant
NOX4	c187980.graph_c0_seq7	NA	NA	12	1	not significant
LOC100129924	c195650.graph_c0_seq10	NA	NA	9	0	not significant
PPP6R3	c191108.graph_c1_seq4	NA	NA	12	1	not significant
PXDC1	c198645.graph_c0_seq2	NA	NA	10	0	not significant
RABIF	c196109.graph_c0_seq1	NA	NA	13	0	not significant
CENPN	c196653.graph_c1_seq13	NA	NA	8	0	not significant
POC5	c198266.graph_c7_seq2	NA	NA	5	1	not significant
AP5M1	c194194.graph_c2_seq3	NA	NA	13	1	not significant
EEF1D	c184371.graph_c0_seq7	NA	NA	12	1	not significant
CCDC22	c200667.graph_c2_seq20	NA	NA	14	1	not significant
NPFF	c160096.graph_c0_seq1	NA	NA	5	0	not significant
MCM8	c197739.graph_c0_seq12	NA	NA	10	0	not significant
C21ORF62	c185349.graph_c0_seq4	NA	NA	8	0	not significant
COLEC12	c197903.graph_c0_seq1	NA	NA	14	1	not significant
TRIM44	c174834.graph_c0_seq1	NA	NA	14	1	not significant
WDR12	c184606.graph_c3_seq1	NA	NA	15	1	not significant
PPP6R3	c191108.graph_c1_seq17	NA	NA	13	1	not significant
CYP2R1	c195916.graph_c2_seq4	NA	NA	12	0	not significant
C16ORF91	c199564.graph_c0_seq1	NA	NA	9	1	not significant
TPD52L2	c194434.graph_c4_seq10	NA	NA	10	1	not significant
MRPS33	c286284.graph_c0_seq1	NA	NA	16	1	not significant
ASRGL1	c191375.graph_c1_seq8	NA	NA	9	1	not significant
MIPOL1	c203775.graph_c0_seq4	NA	NA	9	0	not significant
SNX7	c168128.graph_c0_seq1	NA	NA	3	1	not significant
PIGK	c199582.graph_c0_seq1	NA	NA	16	1	not significant
CLTB	c194387.graph_c0_seq1	NA	NA	14	1	not significant
C9ORF114	c175509.graph_c0_seq15	NA	NA	14	2	not significant
IPO9	c193904.graph_c0_seq12	NA	NA	12	0	not significant
FAHD2B	c183825.graph_c0_seq5	NA	NA	16	0	not significant
SYCE3	c204604.graph_c0_seq1	NA	NA	14	1	not significant
TMEM50A	c186911.graph_c1_seq3	NA	NA	15	1	not significant
NME5	c188876.graph_c0_seq25	NA	NA	13	1	not significant
ABCB8	c201109.graph_c2_seq17	NA	NA	13	0	not significant
MCF2	c192025.graph_c0_seq41	NA	NA	7	1	not significant
TRIM6-TRIM34	c202756.graph_c6_seq31	NA	NA	5	1	not significant
C16ORF90	c203282.graph_c0_seq26	NA	NA	7	0	not significant
MRPL13	c184125.graph_c2_seq1	NA	NA	16	1	not significant
DSE	c195456.graph_c2_seq11	NA	NA	14	1	not significant
BNIP2	c191334.graph_c0_seq1	NA	NA	12	1	not significant
HOGA1	c174078.graph_c0_seq3	NA	NA	13	0	not significant
ISPD	c192052.graph_c1_seq3	NA	NA	8	1	not significant
TCFL5	c199201.graph_c4_seq32	NA	NA	11	0	not significant
PVRL3	c197598.graph_c0_seq3	NA	NA	10	1	not significant
DUSP22	c189387.graph_c1_seq13	NA	NA	15	1	not significant
CDKL2	c197491.graph_c2_seq8	NA	NA	10	0	not significant
SESN1	c187519.graph_c2_seq2	NA	NA	12	1	not significant
GOT2	c193838.graph_c2_seq2	NA	NA	16	1	not significant
COG8	c202431.graph_c0_seq5	NA	NA	14	4	not significant
CLCC1	c200517.graph_c3_seq12	NA	NA	13	1	not significant
XIAP	c200563.graph_c4_seq22	NA	NA	14	0	not significant
MTUS2	c197553.graph_c0_seq8	NA	NA	10	1	not significant
UFSP2	c192729.graph_c0_seq3	NA	NA	14	1	not significant
SLC25A19	c180592.graph_c1_seq2	NA	NA	14	1	not significant
TPD52L2	c194434.graph_c4_seq32	NA	NA	12	1	not significant
LOC722716	c110499.graph_c0_seq1	NA	NA	4	0	not significant
ENDOV	c196961.graph_c0_seq12	NA	NA	3	0	not significant
UBAP2	c199498.graph_c1_seq27	NA	NA	3	0	not significant
ACOT13	c204164.graph_c0_seq1	NA	NA	3	1	not significant
MCF2	c192025.graph_c0_seq27	NA	NA	7	1	not significant
TAPBP	c201241.graph_c3_seq2	NA	NA	6	1	not significant
SLC41A3	c199206.graph_c0_seq4	NA	NA	12	1	not significant
FBXO18	c196914.graph_c2_seq40	NA	NA	14	0	not significant
FBXO18	c196914.graph_c2_seq44	NA	NA	14	0	not significant
ATP2C1	c197969.graph_c2_seq4	NA	NA	12	1	not significant
CHAC1	c180711.graph_c0_seq1	NA	NA	6	1	not significant
ATP2C1	c197969.graph_c2_seq5	NA	NA	12	1	not significant
AHI1	c169432.graph_c0_seq1	NA	NA	9	0	not significant
RNASEK	c204084.graph_c0_seq1	NA	NA	6	0	not significant
HS6ST2	c181295.graph_c0_seq1	NA	NA	10	1	not significant
CCDC183	c200832.graph_c0_seq23	NA	NA	3	0	not significant
SHD	c189784.graph_c1_seq4	NA	NA	12	1	not significant
ARMCX1	c144272.graph_c0_seq1	NA	NA	9	0	not significant
C1GALT1C1	c315880.graph_c0_seq1	NA	NA	16	0	not significant
PIH1D1	c192033.graph_c0_seq15	NA	NA	16	1	not significant
PBDC1	c148729.graph_c0_seq1	NA	NA	14	0	not significant
C8ORF37	c195916.graph_c4_seq1	NA	NA	8	0	not significant
HAUS3	c195544.graph_c3_seq7	NA	NA	14	0	not significant
KCNAB1	c197040.graph_c0_seq5	NA	NA	12	1	not significant
PARVA	c203875.graph_c2_seq16	NA	NA	14	0	not significant
SERPINB6	c202370.graph_c1_seq1	NA	NA	12	0	not significant
AHI1	c169432.graph_c0_seq2	NA	NA	9	0	not significant
PPP1R16B	c171838.graph_c0_seq1	NA	NA	11	1	not significant
SUGT1	c190326.graph_c0_seq7	NA	NA	14	1	not significant
ZNF449	c199363.graph_c2_seq2	NA	NA	10	0	not significant
IGFALS	c197826.graph_c1_seq2	NA	NA	3	0	not significant
POLD4	c147747.graph_c0_seq1	NA	NA	16	1	not significant
CNOT6	c183756.graph_c2_seq28	NA	NA	12	1	not significant
IGFALS	c190744.graph_c1_seq10	NA	NA	3	0	not significant
SYT13	c189169.graph_c1_seq3	NA	NA	10	1	not significant
CBWD1	c196778.graph_c4_seq6	NA	NA	15	1	not significant
HSDL2	c151131.graph_c0_seq1	NA	NA	13	1	not significant
RNASEH2A	c201149.graph_c4_seq9	NA	NA	15	1	not significant
FAM154B	c195773.graph_c0_seq7	NA	NA	9	1	not significant
MMS22L	c200433.graph_c2_seq6	NA	NA	10	3	not significant
DNTTIP2	c195339.graph_c4_seq7	NA	NA	6	0	not significant
TERF1	c202675.graph_c1_seq8	NA	NA	3	0	not significant
SESN1	c187519.graph_c2_seq1	NA	NA	13	1	not significant
FUNDC1	c160890.graph_c0_seq2	NA	NA	16	1	not significant
TYW1	c196233.graph_c1_seq3	NA	NA	9	1	not significant
AGAP_AGAP007063	c200717.graph_c0_seq22	NA	NA	11	0	not significant
PHTF1	c201971.graph_c0_seq44	NA	NA	13	1	not significant
ATP8B4	c203272.graph_c2_seq25	NA	NA	10	7	not significant
BACE1	c184030.graph_c0_seq7	NA	NA	5	1	not significant
TEX30	c184181.graph_c2_seq5	NA	NA	15	1	not significant
UBA5	c200641.graph_c1_seq3	NA	NA	5	1	not significant
TEKT2	c198145.graph_c0_seq4	NA	NA	12	1	not significant
DYNC2LI1	c192742.graph_c2_seq3	NA	NA	14	1	not significant
C2ORF73	c197237.graph_c0_seq1	NA	NA	6	1	not significant
LOC568308	c197853.graph_c3_seq1	NA	NA	15	1	not significant
PSMB10	c197125.graph_c1_seq3	NA	NA	11	1	not significant
SPATA33	c192145.graph_c0_seq11	NA	NA	7	0	not significant
SLC3A2	c179063.graph_c0_seq1	NA	NA	10	1	not significant
MCP7	c184957.graph_c0_seq11	NA	NA	13	0	not significant
LRRC23	c194669.graph_c0_seq6	NA	NA	6	1	not significant
DRAM2	c172657.graph_c1_seq4	NA	NA	14	1	not significant
NDUFA12	c147184.graph_c0_seq1	NA	NA	15	1	not significant
PHC2	c202572.graph_c0_seq15	NA	NA	9	1	not significant
CHMP2B	c141634.graph_c0_seq1	NA	NA	12	1	not significant
B9D1	c152686.graph_c1_seq2	NA	NA	16	1	not significant
KIF16B	c201914.graph_c0_seq1	NA	NA	9	3	not significant
NTS	c163458.graph_c0_seq1	NA	NA	11	1	not significant
UBR3	c197966.graph_c1_seq3	NA	NA	14	2	not significant
DNAJC25	c199215.graph_c3_seq20	NA	NA	8	1	not significant
UBA5	c200641.graph_c1_seq8	NA	NA	5	1	not significant
KIAA1324L	c200772.graph_c7_seq13	NA	NA	10	3	not significant
SLITRK5	c192647.graph_c0_seq1	NA	NA	12	1	not significant
BACE1	c184030.graph_c0_seq6	NA	NA	8	1	not significant
PGM1	c151030.graph_c0_seq1	NA	NA	16	1	not significant
SPATA33	c192145.graph_c0_seq7	NA	NA	9	1	not significant
IPO7	c187901.graph_c1_seq1	NA	NA	10	1	not significant
EXT1	c195434.graph_c2_seq2	NA	NA	15	1	not significant
S100B	c168322.graph_c1_seq1	NA	NA	3	1	not significant
SMURF1	c196508.graph_c0_seq4	NA	NA	12	0	not significant
NXT2	c181869.graph_c1_seq8	NA	NA	11	1	not significant
WDR5B	c195912.graph_c3_seq4	NA	NA	14	1	not significant
SLC11A1	c194041.graph_c8_seq9	NA	NA	12	1	not significant
SNRNP48	c197914.graph_c3_seq13	NA	NA	13	1	not significant
TDRD3	c199705.graph_c0_seq44	NA	NA	15	2	not significant
PPP1R14D	c200515.graph_c6_seq9	NA	NA	10	1	not significant
VPS37D	c176072.graph_c0_seq9	NA	NA	10	1	not significant
AGAP_AGAP007063	c200717.graph_c0_seq68	NA	NA	4	0	not significant
CENPK	c173426.graph_c0_seq5	NA	NA	4	0	not significant
EEF1G	c177056.graph_c0_seq1_PART1	NA	NA	14	1	not significant
GNPDA1	c197889.graph_c0_seq21	NA	NA	14	1	not significant
TBC1D21	c155773.graph_c0_seq1	NA	NA	10	0	not significant
BMPR1B	c202042.graph_c1_seq9	NA	NA	10	1	not significant
WWOX	c199724.graph_c1_seq1	NA	NA	4	1	not significant
SNX15	c194026.graph_c0_seq15	NA	NA	8	1	not significant
FSTL3	c175569.graph_c0_seq4	NA	NA	4	1	not significant
TMEM86A	c155903.graph_c0_seq2	NA	NA	12	1	not significant
PWWP2B	c160626.graph_c0_seq3	NA	NA	9	3	not significant
CAMP	c238712.graph_c0_seq1	NA	NA	5	1	not significant
CD200	c178914.graph_c0_seq5	NA	NA	11	1	not significant
NEIL3	c177250.graph_c0_seq2	NA	NA	10	1	not significant
NOP16	c178256.graph_c0_seq1	NA	NA	15	1	not significant
TMEM205	c204112.graph_c0_seq1	NA	NA	15	0	not significant
RBM26	c189684.graph_c0_seq7	NA	NA	14	1	not significant
MBLAC2	c198099.graph_c0_seq1	NA	NA	11	1	not significant
CDT1	c179398.graph_c0_seq3	NA	NA	10	0	not significant
GSTM3	c196545.graph_c4_seq1	NA	NA	16	0	not significant
CEP170	c193874.graph_c1_seq26	NA	NA	12	1	not significant
MOB2B	c191843.graph_c0_seq3	NA	NA	15	1	not significant
RSF1	c195312.graph_c0_seq4	NA	NA	14	4	not significant
HIP1	c189632.graph_c0_seq1	NA	NA	12	1	not significant
PKIG	c293518.graph_c0_seq1	NA	NA	16	1	not significant
TPPP	c177215.graph_c0_seq1	NA	NA	13	1	not significant
CYSLTR2	c282159.graph_c0_seq1	NA	NA	5	1	not significant
LOC488818	c176493.graph_c0_seq1	NA	NA	5	1	not significant
UPK1A	c197821.graph_c0_seq19	NA	NA	11	1	not significant
NIN	c203070.graph_c0_seq18	NA	NA	6	6	not significant
PPP1R36	c202884.graph_c1_seq23	NA	NA	3	0	not significant
KDM4C	c196442.graph_c1_seq2	NA	NA	10	2	not significant
BPTF	c200170.graph_c0_seq68	NA	NA	10	4	not significant
DIXDC1	c197704.graph_c0_seq10	NA	NA	11	2	not significant
RIBC2	c194079.graph_c0_seq8	NA	NA	9	0	not significant
GCA	c194410.graph_c0_seq3	NA	NA	9	1	not significant
RPAP2	c198299.graph_c0_seq1	NA	NA	5	0	not significant
RGS3	c198045.graph_c0_seq28	NA	NA	6	1	not significant
C5ORF47	c109272.graph_c0_seq2	NA	NA	3	1	not significant
UPK1A	c197821.graph_c0_seq44	NA	NA	11	1	not significant
C9ORF24	c179588.graph_c0_seq6	NA	NA	6	1	not significant
IQCB1	c192258.graph_c0_seq5	NA	NA	12	0	not significant
TNFRSF1A	c191122.graph_c1_seq6	NA	NA	5	1	not significant
DERA	c194703.graph_c2_seq14	NA	NA	14	1	not significant
ACRV1	c224098.graph_c0_seq1	NA	NA	3	0	not significant
COL15A1	c200109.graph_c4_seq3	NA	NA	3	5	not significant
HNRNPUL2	c169896.graph_c0_seq3	NA	NA	16	1	not significant
SEC22C	c196300.graph_c1_seq6	NA	NA	11	1	not significant
PLET1	c206109.graph_c0_seq1	NA	NA	3	0	not significant
TREML2	c189535.graph_c0_seq3	NA	NA	3	0	not significant
BRPF3	c183802.graph_c0_seq1	NA	NA	14	0	not significant
MORC3	c196722.graph_c2_seq6	NA	NA	14	1	not significant
ZRSR2	c182197.graph_c0_seq9	NA	NA	11	0	not significant
MCF2	c192025.graph_c0_seq31	NA	NA	8	2	not significant
LDOC1	c230315.graph_c0_seq1	NA	NA	7	0	not significant
CCDC80	c192558.graph_c1_seq2	NA	NA	15	4	not significant
METTL7A	c200570.graph_c0_seq1	NA	NA	13	0	not significant
CPNE2	c202499.graph_c0_seq10	NA	NA	14	1	not significant
ANXA6	c202322.graph_c3_seq3	NA	NA	16	1	not significant
WBSCR17	c184151.graph_c0_seq1	NA	NA	12	1	not significant
PNPT1	c172605.graph_c1_seq2	NA	NA	14	1	not significant
SMC4	c195864.graph_c3_seq7	NA	NA	14	1	not significant
CRISP2	c178145.graph_c0_seq1	NA	NA	6	0	not significant
RHBDL1	c203756.graph_c0_seq86	NA	NA	10	1	not significant
TNIP2	c194668.graph_c1_seq2	NA	NA	3	1	not significant
MCF2	c192025.graph_c0_seq23	NA	NA	8	0	not significant
IMPA1	c196669.graph_c0_seq18	NA	NA	3	0	not significant
IMPA1	c196669.graph_c0_seq4	NA	NA	3	0	not significant
CD320	c189701.graph_c0_seq9	NA	NA	8	0	not significant
LEF1	c201613.graph_c0_seq9	NA	NA	10	1	not significant
KPTN_8	c183975.graph_c0_seq7	NA	NA	11	2	not significant
TMEM138	c190232.graph_c2_seq18	NA	NA	13	1	not significant
CD151	c193618.graph_c0_seq1	NA	NA	16	1	not significant
LUZP1	c184145.graph_c1_seq1	NA	NA	12	2	not significant
NR5A1	c191195.graph_c0_seq2	NA	NA	9	1	not significant
METTL11B	c186974.graph_c0_seq1	NA	NA	9	1	not significant
CASC1	c203604.graph_c0_seq20	NA	NA	3	6	not significant
TMEM134	c184152.graph_c0_seq18	NA	NA	16	1	not significant
C9ORF135	c192078.graph_c0_seq2	NA	NA	6	1	not significant
SPOCK1	c183746.graph_c0_seq2	NA	NA	12	1	not significant
C1ORF68	c204949.graph_c0_seq1	NA	NA	3	1	not significant
ZNF483	c171095.graph_c0_seq2	NA	NA	4	0	not significant
FAM69C	c193848.graph_c0_seq3	NA	NA	7	4	not significant
LAPTM5	c150920.graph_c0_seq1	NA	NA	16	1	not significant
LDB3_7	c188422.graph_c2_seq3	NA	NA	7	0	not significant
FSTL4	c189193.graph_c0_seq2	NA	NA	11	1	not significant
KCNJ12	c195582.graph_c2_seq4	NA	NA	12	0	not significant
NOTUM	c191904.graph_c3_seq22	NA	NA	14	1	not significant
RMI1	c197020.graph_c0_seq37	NA	NA	9	1	not significant
ASXL3	c178844.graph_c0_seq1	NA	NA	10	5	not significant
GM20267	c291564.graph_c0_seq1	NA	NA	9	1	not significant
PIBF1	c190517.graph_c1_seq7	NA	NA	11	4	not significant
NUP133	c165264.graph_c0_seq1	NA	NA	13	5	not significant
OASL	c202863.graph_c0_seq1	NA	NA	6	1	not significant
HUNK	c203350.graph_c5_seq4	NA	NA	9	1	not significant
C20ORF85	c236368.graph_c0_seq1	NA	NA	8	1	not significant
CCR1_8	c192355.graph_c3_seq6	NA	NA	11	1	not significant
ANO8	c201568.graph_c0_seq32	NA	NA	6	0	not significant
TNF	c186716.graph_c0_seq2	NA	NA	8	0	not significant
NMNAT1	c194908.graph_c5_seq4	NA	NA	12	0	not significant
NCMAP	c201721.graph_c0_seq11	NA	NA	8	1	not significant
PLA2G4F	c199421.graph_c0_seq23	NA	NA	6	0	not significant
CYP2B19	c203797.graph_c0_seq3	NA	NA	12	1	not significant
SLC22A2	c198671.graph_c0_seq8	NA	NA	9	5	not significant
BLOC1S6	c203135.graph_c0_seq76	NA	NA	10	1	not significant
GPR26	c201505.graph_c0_seq3	NA	NA	3	1	not significant
HORMAD2	c176955.graph_c0_seq1	NA	NA	5	0	not significant
LOC100130705	c252865.graph_c0_seq1	NA	NA	6	1	not significant
FAM159A	c200450.graph_c1_seq3	NA	NA	4	0	not significant
LOC709490	c195087.graph_c1_seq5	NA	NA	13	0	not significant
UBXN6	c200677.graph_c0_seq70	NA	NA	12	1	not significant
PTGER4	c186020.graph_c0_seq1	NA	NA	11	1	not significant
FGL1	c196271.graph_c6_seq1	NA	NA	11	0	not significant
CALB2	c140965.graph_c0_seq2	NA	NA	14	1	not significant
TBL2	c154260.graph_c0_seq1	NA	NA	14	3	not significant
HDHD1	c197736.graph_c0_seq1	NA	NA	7	1	not significant
LDB3_7	c188422.graph_c2_seq5	NA	NA	7	1	not significant
CCDC155	c200623.graph_c0_seq33	NA	NA	5	4	not significant
SPICE1	c200509.graph_c0_seq32	NA	NA	12	3	not significant
STK32B	c184446.graph_c0_seq1	NA	NA	10	1	not significant
SLC22A5	c203825.graph_c1_seq31	NA	NA	6	1	not significant
SIX6	c192927.graph_c0_seq5	NA	NA	10	1	not significant
MFAP1	c194473.graph_c0_seq2	NA	NA	16	1	not significant
RANBP17	c192577.graph_c0_seq15	NA	NA	9	2	not significant
GTF2H3	c197317.graph_c0_seq2	NA	NA	4	1	not significant
COL13A1	c198977.graph_c0_seq23	NA	NA	7	2	not significant
TNNT2	c166673.graph_c0_seq3	NA	NA	12	1	not significant
NFATC4	c203406.graph_c0_seq7	NA	NA	11	2	not significant
CNNM3	c184012.graph_c0_seq31	NA	NA	3	0	not significant
ZBED4	c191994.graph_c1_seq2	NA	NA	6	2	not significant
CSTB	c198489.graph_c1_seq1	NA	NA	11	0	not significant
TAS1R1	c173660.graph_c0_seq4	NA	NA	3	0	not significant
PLXNA3	c193080.graph_c0_seq8	NA	NA	11	3	not significant
CH25H	c180804.graph_c0_seq1	NA	NA	11	0	not significant
SPAG17	c202754.graph_c2_seq11	NA	NA	7	5	not significant
ENTPD6	c199950.graph_c0_seq5	NA	NA	13	1	not significant
ST3GAL1	c202400.graph_c0_seq4	NA	NA	13	2	not significant
TFAP4	c176497.graph_c1_seq2	NA	NA	12	1	not significant
LRBA	c199995.graph_c1_seq1	NA	NA	11	2	not significant
FAM71E1	c195032.graph_c4_seq3	NA	NA	3	0	not significant
TTYH3	c171072.graph_c1_seq2	NA	NA	14	1	not significant
HDGFRP2	c175408.graph_c0_seq1	NA	NA	5	3	not significant
TMIE	c195682.graph_c0_seq5	NA	NA	11	1	not significant
MAP1A	c188141.graph_c0_seq1	NA	NA	11	8	not significant
GUK1	c195416.graph_c1_seq39	NA	NA	11	1	not significant
OSCP1	c201083.graph_c2_seq4	NA	NA	13	1	not significant
NEK4_11	c203609.graph_c2_seq7	NA	NA	4	3	not significant
NFATC4	c203406.graph_c0_seq45	NA	NA	11	2	not significant
CDCA2	c200959.graph_c0_seq2	NA	NA	3	5	not significant
SLC25A51	c197014.graph_c7_seq2	NA	NA	11	1	not significant
OSBPL10	c181774.graph_c0_seq1	NA	NA	9	0	not significant
RABEPK	c189369.graph_c2_seq6	NA	NA	13	3	not significant
LTBP1	c193312.graph_c0_seq7	NA	NA	11	1	not significant
CYP2J9	c203868.graph_c2_seq1	NA	NA	12	5	not significant
TRAPPC2L	c201587.graph_c0_seq9	NA	NA	14	1	not significant
HSP90AA1	c204040.graph_c0_seq1	NA	NA	15	1	not significant
GPATCH2	c203529.graph_c0_seq17	NA	NA	4	3	not significant
RAB3GAP1	c181129.graph_c1_seq1	NA	NA	13	5	not significant
HOXA7	c198313.graph_c0_seq17	NA	NA	11	1	not significant
C4ORF51	c184511.graph_c0_seq2	NA	NA	3	0	not significant
CCDC39	c195840.graph_c0_seq1	NA	NA	10	4	not significant
ADAD2	c193190.graph_c0_seq1	NA	NA	5	0	not significant
ANO1	c194434.graph_c4_seq49	NA	NA	12	1	not significant
MED23	c196712.graph_c1_seq29	NA	NA	11	2	not significant
STAR	c202985.graph_c8_seq1	NA	NA	6	0	not significant
TSPAN11	c162129.graph_c0_seq3	NA	NA	6	1	not significant
NIN	c203070.graph_c0_seq7	NA	NA	9	7	not significant
NIN	c203070.graph_c0_seq28	NA	NA	9	7	not significant
C19ORF54	c196374.graph_c1_seq23	NA	NA	12	1	not significant
ARFGAP3	c182525.graph_c1_seq1	NA	NA	4	1	not significant
BCKDHA	c200213.graph_c0_seq25	NA	NA	16	1	not significant
SP2353	c202202.graph_c0_seq3	NA	NA	11	4	not significant
ZNF335	c201970.graph_c3_seq26	NA	NA	14	1	not significant
LOC102724023	c345477.graph_c0_seq1	NA	NA	14	1	not significant
MTIF2	c196982.graph_c1_seq39	NA	NA	14	0	not significant
KIAA1024	c200142.graph_c0_seq6	NA	NA	10	2	not significant
CAPN2	c188560.graph_c0_seq2	NA	NA	4	1	not significant
RNF157	c199262.graph_c1_seq4	NA	NA	13	2	not significant
NR1H2	c201617.graph_c0_seq125	NA	NA	13	0	not significant
SYT13	c189169.graph_c1_seq1	NA	NA	6	1	not significant
NR1H2	c201617.graph_c0_seq44	NA	NA	13	0	not significant
REST	c188298.graph_c0_seq4	NA	NA	3	3	not significant
LMNA	c191844.graph_c3_seq4	NA	NA	11	1	not significant
SMYD1	c201539.graph_c0_seq10	NA	NA	11	1	not significant
UBTF	c199441.graph_c4_seq4	NA	NA	15	1	not significant
UBTF	c199441.graph_c4_seq5	NA	NA	15	1	not significant
DNAJB12	c182661.graph_c1_seq1	NA	NA	14	1	not significant
SPAG9	c199885.graph_c3_seq19	NA	NA	13	2	not significant
ACPL2	c196900.graph_c0_seq2	NA	NA	12	3	not significant
PRELP	c194043.graph_c0_seq1	NA	NA	13	1	not significant
LRP8	c203307.graph_c0_seq8	NA	NA	8	3	not significant
LEPR	c193515.graph_c1_seq20	NA	NA	7	3	not significant
LEPR	c193515.graph_c1_seq28	NA	NA	7	3	not significant
RNF183	c172600.graph_c0_seq5	NA	NA	13	0	not significant
TMEM52B	c185168.graph_c0_seq2	NA	NA	3	4	not significant
OTOF	c196038.graph_c0_seq14	NA	NA	3	1	not significant
SPAG9	c199885.graph_c3_seq50	NA	NA	13	2	not significant
SERPINA12	c168599.graph_c0_seq1	NA	NA	5	2	not significant
ATAD5	c200676.graph_c1_seq16	NA	NA	6	2	not significant
SPAG9	c199885.graph_c3_seq18	NA	NA	13	2	not significant
ISM1	c192521.graph_c0_seq1	NA	NA	11	0	not significant
ATP5J2-PTCD1	c192651.graph_c2_seq2	NA	NA	12	1	not significant
GRTP1	c186987.graph_c0_seq3	NA	NA	10	0	not significant
KDM4C	c196442.graph_c1_seq3	NA	NA	3	4	not significant
FAM46B	c180922.graph_c0_seq1	NA	NA	10	0	not significant
ATRIP	c189851.graph_c0_seq16	NA	NA	6	0	not significant
SLC26A5	c188147.graph_c0_seq2	NA	NA	3	0	not significant
LMF2	c197509.graph_c0_seq65	NA	NA	12	1	not significant
MGA	c196923.graph_c0_seq3	NA	NA	3	4	not significant
AGAP_AGAP002110	c199760.graph_c4_seq37	NA	NA	11	1	not significant
UNC5A	c192774.graph_c0_seq18	NA	NA	12	1	not significant
PHLPP2	c183934.graph_c0_seq2	NA	NA	13	4	not significant
LOC100330147	c202173.graph_c1_seq37	NA	NA	9	3	not significant
NKD2	c202726.graph_c1_seq5	NA	NA	4	0	not significant
DIS3L2	c198205.graph_c4_seq16	NA	NA	3	5	not significant
STRADA	c194442.graph_c1_seq13	NA	NA	15	1	not significant
LHFPL5	c156491.graph_c0_seq3	NA	NA	13	1	not significant
STRADA	c194442.graph_c1_seq15	NA	NA	15	1	not significant
DLGAP5	c199561.graph_c0_seq2	NA	NA	3	9	not significant
CKM	c204007.graph_c0_seq1	NA	NA	13	1	not significant
CC2D1A	c195352.graph_c1_seq6	NA	NA	11	1	not significant
ACOX2	c195396.graph_c5_seq4	NA	NA	11	1	not significant
RFTN1_9	c200307.graph_c0_seq3	NA	NA	9	3	not significant
TOR1A	c197793.graph_c8_seq5	NA	NA	15	1	not significant
MED23	c196712.graph_c1_seq7	NA	NA	11	2	not significant
MED23	c196712.graph_c1_seq13	NA	NA	11	2	not significant
TBC1D25	c189099.graph_c0_seq4	NA	NA	14	1	not significant
PGAP1	c195177.graph_c1_seq8	NA	NA	11	2	not significant
GATA3	c200333.graph_c1_seq6	NA	NA	10	1	not significant
COL4A3	c201386.graph_c0_seq59	NA	NA	10	3	not significant
LOC563561	c192150.graph_c0_seq55	NA	NA	4	4	not significant
MEF2BNB	c195382.graph_c2_seq2	NA	NA	14	1	not significant
RBBP6	c200577.graph_c1_seq11	NA	NA	14	1	not significant
LOC101055983	c188187.graph_c1_seq2	NA	NA	3	6	not significant
RAB28	c201556.graph_c1_seq2	NA	NA	15	0	not significant
SEMA3B	c201352.graph_c0_seq71	NA	NA	3	1	not significant
POLR3A	c200497.graph_c4_seq18	NA	NA	4	1	not significant
ZRANB3	c200897.graph_c0_seq65	NA	NA	5	1	not significant
ROBO1	c203377.graph_c5_seq8	NA	NA	11	1	not significant
ACVR1C	c173034.graph_c0_seq5	NA	NA	10	1	not significant
FAP	c186468.graph_c0_seq1	NA	NA	11	1	not significant
ERICH4	c202991.graph_c2_seq27	NA	NA	3	0	not significant
SMARCE1	c173343.graph_c1_seq3	NA	NA	16	2	not significant
FLII	c190172.graph_c0_seq5	NA	NA	14	1	not significant
CKAP5	c184000.graph_c0_seq4	NA	NA	10	1	not significant
PPP2R3A	c153159.graph_c0_seq2	NA	NA	10	1	not significant
THSD7B	c185515.graph_c0_seq1	NA	NA	10	3	not significant
GRAMD1C	c199731.graph_c1_seq1	NA	NA	7	3	not significant
FLII	c190172.graph_c0_seq8	NA	NA	14	1	not significant
TBC1D31	c194255.graph_c0_seq11	NA	NA	10	4	not significant
FCGR2A	c199867.graph_c3_seq4	NA	NA	5	3	not significant
CYP7A1	c194854.graph_c0_seq1	NA	NA	14	1	not significant
FANK1	c202820.graph_c0_seq38	NA	NA	10	3	not significant
CCDC136	c201199.graph_c1_seq36	NA	NA	5	3	not significant
CCDC173	c198927.graph_c0_seq3	NA	NA	3	0	not significant
ATXN7L3	c196567.graph_c8_seq6	NA	NA	15	1	not significant
ATXN7L3	c196567.graph_c8_seq9	NA	NA	15	1	not significant
SPATA22	c190121.graph_c0_seq2	NA	NA	9	2	not significant
AIRE	c194797.graph_c0_seq17	NA	NA	3	0	not significant
C16ORF11	c191767.graph_c0_seq8	NA	NA	7	1	not significant
PSMC6	c161188.graph_c0_seq1	NA	NA	16	0	not significant
TMEM74B	c315453.graph_c0_seq1	NA	NA	9	2	not significant
CCT8L2	c301701.graph_c0_seq1	NA	NA	5	5	not significant
RNF123	c202463.graph_c2_seq53	NA	NA	11	2	not significant
AKAP4	c273795.graph_c0_seq1	NA	NA	11	2	not significant
CA2	c173436.graph_c0_seq1	NA	NA	15	2	not significant
SCIN	c193054.graph_c0_seq2	NA	NA	10	1	not significant
ZNF688	c195583.graph_c3_seq19	NA	NA	4	6	not significant
KIF23	c199989.graph_c3_seq14	NA	NA	9	0	not significant
POLQ	c203117.graph_c3_seq58	NA	NA	6	4	not significant
PCDHA11	c203912.graph_c0_seq43	NA	NA	3	5	not significant
SAYSD1	c188964.graph_c0_seq3	NA	NA	6	1	not significant
AP4E1	c201784.graph_c0_seq2	NA	NA	4	5	not significant
DIXDC1	c197704.graph_c0_seq38	NA	NA	9	2	not significant
ECHDC3	c170065.graph_c0_seq2	NA	NA	14	1	not significant
RBL2	c199831.graph_c0_seq2	NA	NA	14	2	not significant
ATG16L1	c199705.graph_c0_seq26	NA	NA	12	1	not significant
NLRC5	c203806.graph_c5_seq93	NA	NA	3	8	not significant
APOC3	c74012.graph_c0_seq1	NA	NA	10	0	not significant
UVSSA	c199188.graph_c1_seq1	NA	NA	7	2	not significant
OAF	c199793.graph_c0_seq3	NA	NA	13	2	not significant
LOC703053	c193805.graph_c0_seq1	NA	NA	12	3	not significant
CEP164	c202085.graph_c0_seq88	NA	NA	6	3	not significant
YPEL3	c169513.graph_c0_seq2	NA	NA	15	0	not significant
UNC45A	c198011.graph_c6_seq20	NA	NA	14	1	not significant
GALNT2	c172382.graph_c0_seq1	NA	NA	14	0	not significant
RIOK2	c200273.graph_c6_seq27	NA	NA	13	1	not significant
AGTRAP	c195755.graph_c0_seq1	NA	NA	11	2	not significant
DDRGK1	c199016.graph_c0_seq2	NA	NA	14	1	not significant
USP30	c200501.graph_c0_seq52	NA	NA	14	1	not significant
SEPT14	c192809.graph_c1_seq12	NA	NA	6	1	not significant
CDPF1	c191952.graph_c3_seq5	NA	NA	12	1	not significant
UHRF1BP1L	c195702.graph_c0_seq4	NA	NA	12	2	not significant
NIFK	c185509.graph_c1_seq1	NA	NA	10	0	not significant
UNC79	c201227.graph_c0_seq23	NA	NA	5	2	not significant
ADAT1	c198776.graph_c0_seq9	NA	NA	8	3	not significant
FAM160A1	c196764.graph_c0_seq19	NA	NA	5	1	not significant
LRRC71	c200267.graph_c5_seq22	NA	NA	5	0	not significant
GDI1	c172909.graph_c0_seq1	NA	NA	16	1	not significant
NEK1	c202764.graph_c2_seq6	NA	NA	10	2	not significant
SLC6A8	c196205.graph_c1_seq94	NA	NA	14	1	not significant
DGKZ	c184108.graph_c0_seq2	NA	NA	13	1	not significant
GTSF1	c168761.graph_c0_seq3	NA	NA	10	1	not significant
AMPD3	c196954.graph_c0_seq8	NA	NA	4	0	not significant
POMGNT2	c194018.graph_c0_seq3	NA	NA	13	1	not significant
HLTF	c196616.graph_c1_seq3	NA	NA	15	1	not significant
SLC38A3	c194044.graph_c0_seq58	NA	NA	15	2	not significant
SCFD2	c198006.graph_c0_seq2	NA	NA	10	2	not significant
CDON_9	c199479.graph_c0_seq7	NA	NA	12	1	not significant
ZNF688	c195583.graph_c3_seq3	NA	NA	3	6	not significant
TENC1	c201207.graph_c3_seq34	NA	NA	12	4	not significant
PELP1	c183837.graph_c0_seq3	NA	NA	10	2	not significant
ARMC12	c200371.graph_c0_seq25	NA	NA	8	0	not significant
WDFY4	c201372.graph_c4_seq31	NA	NA	9	7	not significant
NFKBIE	c197801.graph_c1_seq20	NA	NA	6	2	not significant
C530008M17RIK	c198284.graph_c0_seq10	NA	NA	3	6	not significant
LYAR	c191770.graph_c0_seq11	NA	NA	12	1	not significant
EBF2	c201125.graph_c0_seq2	NA	NA	10	1	not significant
KIF6	c201345.graph_c0_seq1	NA	NA	7	3	not significant
CORIN	c203197.graph_c0_seq7	NA	NA	3	4	not significant
UNC13A	c200804.graph_c1_seq46	NA	NA	9	0	not significant
C15ORF52	c197923.graph_c0_seq72	NA	NA	3	0	not significant
DSC3	c198078.graph_c0_seq10	NA	NA	11	2	not significant
DSC3	c198078.graph_c0_seq12	NA	NA	11	2	not significant
AGAP2	c180704.graph_c0_seq5	NA	NA	11	1	not significant
VAT1L	c193853.graph_c0_seq1	NA	NA	10	1	not significant
AKAP5	c200877.graph_c0_seq2	NA	NA	5	0	not significant
KCNG1	c180031.graph_c0_seq1	NA	NA	3	1	not significant
FLNB	c197751.graph_c0_seq2	NA	NA	4	2	not significant
TBC1D2	c202630.graph_c0_seq6	NA	NA	4	0	not significant
SYTL5	c194354.graph_c1_seq6	NA	NA	9	1	not significant
EHHADH	c201092.graph_c0_seq8	NA	NA	15	3	not significant
ZSWIM2	c167318.graph_c0_seq5	NA	NA	4	4	not significant
FOXM1	c199366.graph_c0_seq60	NA	NA	9	4	not significant
CLDN22	c170936.graph_c0_seq1	NA	NA	13	2	not significant
ACLY	c184121.graph_c0_seq2	NA	NA	12	2	not significant
SLC2A10	c197936.graph_c1_seq16	NA	NA	10	2	not significant
ACLY	c184121.graph_c0_seq1	NA	NA	12	2	not significant
SYTL5	c194354.graph_c1_seq7	NA	NA	9	1	not significant
MFSD9	c193041.graph_c0_seq12	NA	NA	5	1	not significant
RTKN	c199902.graph_c0_seq11	NA	NA	10	1	not significant
MTTP	c198209.graph_c2_seq3	NA	NA	14	3	not significant
SLC15A1	c167905.graph_c0_seq2	NA	NA	9	1	not significant
SDE2	c202487.graph_c3_seq39	NA	NA	10	1	not significant
FBXO32	c174907.graph_c0_seq3	NA	NA	12	1	not significant
FAM134B	c195776.graph_c0_seq1	NA	NA	13	2	not significant
ZNF445	c199250.graph_c0_seq13	NA	NA	4	5	not significant
WSCD1	c198858.graph_c0_seq4	NA	NA	13	2	not significant
CHPF	c156110.graph_c0_seq1	NA	NA	13	2	not significant
BCL2L1	c186669.graph_c0_seq5	NA	NA	15	1	not significant
SBF2	c193041.graph_c0_seq14	NA	NA	12	2	not significant
TEC	c200270.graph_c1_seq10	NA	NA	12	2	not significant
PTCHD4	c176852.graph_c0_seq1	NA	NA	10	2	not significant
COPS6	c197093.graph_c1_seq2	NA	NA	17	0	not significant
FOXM1	c199366.graph_c0_seq18	NA	NA	9	4	not significant
WNK1_8	c195140.graph_c2_seq12	NA	NA	12	7	not significant
SFI1	c202860.graph_c0_seq4	NA	NA	3	7	not significant
MARCH10	c170281.graph_c0_seq7	NA	NA	3	4	not significant
FAM19A4	c174008.graph_c0_seq6	NA	NA	10	1	not significant
IFT43	c179347.graph_c0_seq4	NA	NA	14	1	not significant
GALNT18	c201726.graph_c1_seq5	NA	NA	13	1	not significant
CHCHD3	c243523.graph_c0_seq1	NA	NA	12	2	not significant
SEL1L	c198856.graph_c0_seq3	NA	NA	3	2	not significant
SEMA4C	c198327.graph_c1_seq18	NA	NA	12	1	not significant
MIA3_7	c202393.graph_c3_seq1	NA	NA	3	3	not significant
RPP30	c200521.graph_c1_seq7	NA	NA	6	1	not significant
TTLL1	c200109.graph_c8_seq5	NA	NA	15	2	not significant
DGAT1	c200392.graph_c0_seq73	NA	NA	9	1	not significant
LRRFIP1	c201360.graph_c1_seq17	NA	NA	3	5	not significant
TRIB3	c177050.graph_c0_seq1	NA	NA	6	1	not significant
FRY	c197648.graph_c0_seq3	NA	NA	11	1	not significant
ACSL6	c197827.graph_c0_seq2	NA	NA	12	2	not significant
ACSL6	c197827.graph_c0_seq3	NA	NA	12	2	not significant
SFI1	c202860.graph_c0_seq25	NA	NA	3	7	not significant
SFI1	c202860.graph_c0_seq71	NA	NA	3	7	not significant
TUBGCP6	c201892.graph_c0_seq96	NA	NA	5	4	not significant
ATIC	c181929.graph_c0_seq2	NA	NA	15	1	not significant
MFSD6L	c179011.graph_c0_seq1	NA	NA	5	2	not significant
GPR19	c193654.graph_c0_seq3	NA	NA	13	1	not significant
SETX	c196659.graph_c3_seq3	NA	NA	5	7	not significant
CG1671	c202527.graph_c2_seq19	NA	NA	13	3	not significant
FAM159B	c187028.graph_c0_seq4	NA	NA	10	0	not significant
DRC1	c155499.graph_c0_seq3	NA	NA	3	3	not significant
ELMOD3	c201276.graph_c0_seq17	NA	NA	12	1	not significant
CPA6	c144461.graph_c0_seq3	NA	NA	8	1	not significant
SH3D19	c194389.graph_c0_seq1	NA	NA	3	1	not significant
PHRF1	c194411.graph_c0_seq2	NA	NA	7	4	not significant
C19ORF38	c181937.graph_c0_seq2	NA	NA	5	1	not significant
RUFY2	c202953.graph_c4_seq51	NA	NA	10	1	not significant
ADD2	c203052.graph_c0_seq1	NA	NA	11	1	not significant
HSPA12A	c194666.graph_c0_seq19	NA	NA	12	1	not significant
AK4	c201814.graph_c0_seq1	NA	NA	12	1	not significant
OLFML2B	c187955.graph_c0_seq2	NA	NA	12	1	not significant
OTOGL	c179375.graph_c0_seq1	NA	NA	4	5	not significant
GTDC1	c195491.graph_c3_seq9	NA	NA	9	0	not significant
EXOSC5	c173434.graph_c0_seq1	NA	NA	16	1	not significant
DDX59	c175454.graph_c2_seq8	NA	NA	14	1	not significant
ANO4	c201205.graph_c2_seq20	NA	NA	9	4	not significant
TSPYL4	c239459.graph_c0_seq1	NA	NA	5	2	not significant
COG1	c190315.graph_c1_seq14	NA	NA	13	1	not significant
PLEKHG4	c195222.graph_c0_seq48	NA	NA	8	1	not significant
CD97	c196863.graph_c0_seq23	NA	NA	3	2	not significant
GOLGA4	c186703.graph_c1_seq2	NA	NA	8	4	not significant
WHAMM	c192477.graph_c8_seq14	NA	NA	8	3	not significant
RAVER2	c202900.graph_c0_seq8	NA	NA	3	2	not significant
CNTRL	c201220.graph_c0_seq52	NA	NA	6	8	not significant
GPR98	c203863.graph_c0_seq17	NA	NA	6	19	not significant
PLEKHG4	c195222.graph_c0_seq11	NA	NA	8	1	not significant
ZC3HC1	c198653.graph_c2_seq18	NA	NA	12	1	not significant
MIER2	c196232.graph_c0_seq44	NA	NA	12	1	not significant
LDHD	c202026.graph_c4_seq13	NA	NA	12	2	not significant
CKAP2	c197604.graph_c2_seq6	NA	NA	3	4	not significant
LFNG	c201946.graph_c2_seq16	NA	NA	6	0	not significant
GTF2H3	c197317.graph_c0_seq3	NA	NA	13	1	not significant
DPYSL2	c198634.graph_c0_seq5	NA	NA	14	14	not significant
C4ORF22	c190096.graph_c0_seq4	NA	NA	10	4	not significant
MTUS2	c197553.graph_c0_seq6	NA	NA	3	7	not significant
TRDN	c200936.graph_c1_seq7	NA	NA	4	4	not significant
LARGE	c203841.graph_c1_seq13	NA	NA	11	1	not significant
ATMS	c173991.graph_c0_seq2	NA	NA	15	1	not significant
CD207	c175620.graph_c0_seq12	NA	NA	5	0	not significant
PLEKHG3	c189921.graph_c4_seq1	NA	NA	3	3	not significant
COL9A2	c193470.graph_c0_seq12	NA	NA	11	3	not significant
ZNF592	c187253.graph_c0_seq1	NA	NA	12	1	not significant
LDLR	c195170.graph_c0_seq11	NA	NA	3	1	not significant
IGSF10	c191471.graph_c0_seq2	NA	NA	5	9	not significant
ALKBH3	c199662.graph_c2_seq5	NA	NA	13	1	not significant
NID2	c202662.graph_c2_seq2	NA	NA	8	5	not significant
FAM196A	c175113.graph_c0_seq1	NA	NA	10	1	not significant
SLC9A7	c193948.graph_c1_seq3	NA	NA	9	1	not significant
TEX15	c187635.graph_c0_seq1	NA	NA	4	0	not significant
TBRG1	c183839.graph_c0_seq24	NA	NA	13	1	not significant
SREBF1	c198378.graph_c0_seq2	NA	NA	11	1	not significant
LRCH4	c198786.graph_c0_seq6	NA	NA	12	2	not significant
SORBS2	c201167.graph_c4_seq15	NA	NA	7	3	not significant
WDHD1	c201710.graph_c0_seq11	NA	NA	3	5	not significant
SVIL	c202078.graph_c2_seq15	NA	NA	5	4	not significant
1700019G17RIK	c189175.graph_c0_seq3	NA	NA	6	2	not significant
TDRD6	c163554.graph_c0_seq2	NA	NA	3	3	not significant
ARNT2	c203168.graph_c1_seq8	NA	NA	13	0	not significant
DARC	c193228.graph_c0_seq1	NA	NA	6	2	not significant
CPA3	c179160.graph_c0_seq2	NA	NA	10	2	not significant
TRIB1	c176388.graph_c0_seq2	NA	NA	6	0	not significant
RAB3GAP2	c202598.graph_c0_seq30	NA	NA	5	4	not significant
ITGA1	c192524.graph_c2_seq2	NA	NA	13	2	not significant
MASTL	c196158.graph_c1_seq3	NA	NA	8	2	not significant
BCAR1	c197172.graph_c0_seq2	NA	NA	11	1	not significant
PELP1	c183837.graph_c0_seq8	NA	NA	6	2	not significant
SPATA18	c184314.graph_c0_seq3	NA	NA	4	1	not significant
ROCK2	c199855.graph_c6_seq29	NA	NA	13	1	not significant
C5	c187544.graph_c0_seq2	NA	NA	11	4	not significant
FAM134C	c200758.graph_c0_seq110	NA	NA	10	4	not significant
VARS2	c203423.graph_c1_seq4	NA	NA	9	4	not significant
VARS2	c203423.graph_c1_seq60	NA	NA	9	4	not significant
CHAF1A	c192551.graph_c0_seq24	NA	NA	5	1	not significant
LOC721004	c186904.graph_c0_seq1	NA	NA	12	2	not significant
MUL1	c193235.graph_c0_seq1	NA	NA	16	1	not significant
KAZN	c193417.graph_c1_seq5	NA	NA	9	1	not significant
EPC1	c199988.graph_c1_seq3	NA	NA	14	3	not significant
TTC8	c200050.graph_c1_seq4	NA	NA	12	1	not significant
KLHL34	c209456.graph_c0_seq1	NA	NA	6	3	not significant
ARFGEF2	c195775.graph_c0_seq6	NA	NA	10	3	not significant
LRFN5	c192059.graph_c1_seq5	NA	NA	12	1	not significant
DYNC2H1	c199932.graph_c1_seq4	NA	NA	10	9	not significant
EPC1	c199988.graph_c1_seq19	NA	NA	14	3	not significant
TTC8	c200050.graph_c1_seq6	NA	NA	12	1	not significant
DYNC2H1	c199932.graph_c1_seq10	NA	NA	10	9	not significant
CSTF1	c162816.graph_c0_seq1	NA	NA	15	0	not significant
NRP1	c203647.graph_c3_seq11	NA	NA	11	1	not significant
NRP1	c203647.graph_c3_seq24	NA	NA	11	1	not significant
C9ORF84	c190539.graph_c0_seq9	NA	NA	3	2	not significant
PLD5	c201651.graph_c0_seq10	NA	NA	11	1	not significant
SCRIB	c157126.graph_c0_seq3	NA	NA	14	2	not significant
UFC1	c152015.graph_c0_seq2	NA	NA	16	0	not significant
ANKS1A	c201244.graph_c1_seq33	NA	NA	12	1	not significant
LPPR2	c197392.graph_c5_seq9	NA	NA	9	1	not significant
CANT1	c158471.graph_c0_seq6	NA	NA	14	2	not significant
TMEM108	c203089.graph_c7_seq1	NA	NA	12	2	not significant
FRMPD1	c200444.graph_c0_seq5	NA	NA	11	1	not significant
SLCO5A1	c190317.graph_c0_seq6	NA	NA	10	1	not significant
CFH	c176421.graph_c0_seq1	NA	NA	6	1	not significant
SLCO5A1	c190317.graph_c0_seq3	NA	NA	10	1	not significant
FLNB	c197751.graph_c0_seq11	NA	NA	4	2	not significant
WIPI1	c202759.graph_c1_seq50	NA	NA	16	1	not significant
HERC1	c200456.graph_c1_seq9	NA	NA	12	2	not significant
CCIN	c186244.graph_c0_seq1	NA	NA	9	4	not significant
LRRIQ1	c202582.graph_c0_seq34	NA	NA	4	2	not significant
EMC1	c196314.graph_c1_seq32	NA	NA	11	3	not significant
HDAC5	c192688.graph_c0_seq19	NA	NA	3	0	not significant
FAM189B	c191746.graph_c0_seq9	NA	NA	3	1	not significant
MC1R	c202399.graph_c0_seq1	NA	NA	11	1	not significant
NSUN3	c181147.graph_c0_seq4	NA	NA	14	1	not significant
TUBG2	c199629.graph_c1_seq11	NA	NA	10	2	not significant
GPR12	c202413.graph_c1_seq56	NA	NA	14	2	not significant
LOC459382	c198270.graph_c4_seq3	NA	NA	11	2	not significant
FAM114A2	c197530.graph_c0_seq7	NA	NA	13	2	not significant
TENC1	c201207.graph_c3_seq30	NA	NA	12	4	not significant
COLGALT2	c199170.graph_c1_seq8	NA	NA	12	1	not significant
COL16A1	c201438.graph_c2_seq34	NA	NA	10	2	not significant
PCDH7	c200032.graph_c1_seq3	NA	NA	11	2	not significant
IFT172	c200067.graph_c0_seq32	NA	NA	13	7	not significant
PCDH7	c200032.graph_c1_seq6	NA	NA	11	2	not significant
NHS	c176620.graph_c0_seq6	NA	NA	11	1	not significant
QSER1	c180461.graph_c0_seq2	NA	NA	13	0	not significant
ATP11C	c199182.graph_c1_seq56	NA	NA	12	2	not significant
ATP11C	c199182.graph_c1_seq38	NA	NA	12	2	not significant
NEDD1	c202504.graph_c4_seq2	NA	NA	11	1	not significant
C9ORF84	c190539.graph_c0_seq3	NA	NA	3	2	not significant
FRS2	c202173.graph_c1_seq23	NA	NA	15	2	not significant
STXBP5L	c193159.graph_c2_seq3	NA	NA	9	2	not significant
SYNRG	c198909.graph_c0_seq22	NA	NA	7	1	not significant
STAC	c202251.graph_c0_seq1	NA	NA	8	3	not significant
LTBP1	c193312.graph_c0_seq8	NA	NA	10	1	not significant
MPDZ	c193697.graph_c0_seq5	NA	NA	3	3	not significant
AKTIP	c192635.graph_c1_seq4	NA	NA	15	0	not significant
TENC1	c201207.graph_c3_seq75	NA	NA	12	4	not significant
PREP	c157881.graph_c0_seq1	NA	NA	14	1	not significant
EZH1	c202297.graph_c1_seq93	NA	NA	12	2	not significant
FBXO43	c143743.graph_c0_seq3	NA	NA	6	1	not significant
CNST	c200747.graph_c0_seq1	NA	NA	8	2	not significant
LNX1	c192986.graph_c2_seq3	NA	NA	10	1	not significant
CCDC171	c200264.graph_c1_seq68	NA	NA	3	5	not significant
FAIM2	c198538.graph_c6_seq1	NA	NA	14	2	not significant
GTF2H4	c201232.graph_c0_seq1	NA	NA	12	0	not significant
SELPLG	c199310.graph_c0_seq1	NA	NA	3	0	not significant
NPEPL1	c192317.graph_c1_seq2	NA	NA	12	1	not significant
STX16	c190739.graph_c2_seq27	NA	NA	13	0	not significant
C11ORF84	c183972.graph_c0_seq7	NA	NA	13	1	not significant
CRELD2	c194436.graph_c0_seq4	NA	NA	15	0	not significant
RACGAP1	c168987.graph_c0_seq1	NA	NA	3	2	not significant
CCRL2	c182164.graph_c0_seq3	NA	NA	3	3	not significant
DPYD	c196836.graph_c0_seq10	NA	NA	6	4	not significant
UNC93A	c202464.graph_c1_seq11	NA	NA	7	1	not significant
C11ORF30	c200766.graph_c1_seq30	NA	NA	14	0	not significant
AKAP12	c198777.graph_c0_seq1	NA	NA	3	0	not significant
MAP3K5	c201031.graph_c0_seq18	NA	NA	13	1	not significant
PCDH7	c200032.graph_c1_seq1	NA	NA	12	1	not significant
LAMB3	c200787.graph_c2_seq113	NA	NA	10	8	not significant
PWWP2A	c200883.graph_c5_seq3	NA	NA	6	2	not significant
ANKRD27	c202533.graph_c1_seq72	NA	NA	12	1	not significant
HSD3B2	c169009.graph_c0_seq2	NA	NA	6	1	not significant
LOC700691	c202003.graph_c1_seq2	NA	NA	13	1	not significant
CASC3	c194635.graph_c0_seq18	NA	NA	13	1	not significant
SPG11	c199841.graph_c0_seq10	NA	NA	9	2	not significant
TBX19	c197352.graph_c4_seq77	NA	NA	10	1	not significant
BZW1	c171855.graph_c0_seq1	NA	NA	14	1	not significant
SLC12A8	c195361.graph_c0_seq11	NA	NA	9	0	not significant
CEP78	c198085.graph_c4_seq9	NA	NA	11	1	not significant
UBR5	c202796.graph_c5_seq4	NA	NA	13	1	not significant
PTGS1	c194160.graph_c0_seq22	NA	NA	12	1	not significant
JAKMIP1	c203039.graph_c0_seq15	NA	NA	9	1	not significant
POMT2	c202158.graph_c1_seq20	NA	NA	13	1	not significant
XIRP2	c201755.graph_c0_seq1	NA	NA	7	4	not significant
ARHGDIA	c214253.graph_c0_seq1	NA	NA	16	0	not significant
PARP2	c199545.graph_c1_seq57	NA	NA	11	2	not significant
CD300A	c200502.graph_c0_seq43	NA	NA	3	4	not significant
TLR4	c192717.graph_c0_seq1	NA	NA	7	2	not significant
NFASC	c202929.graph_c0_seq22	NA	NA	7	1	not significant
NUP160	c201925.graph_c3_seq45	NA	NA	10	1	not significant
TBC1D8	c199189.graph_c6_seq11	NA	NA	12	2	not significant
HP	c73707.graph_c0_seq1	NA	NA	14	1	not significant
PDCD6	c174551.graph_c0_seq2	NA	NA	14	1	not significant
THOP1	c198449.graph_c0_seq11	NA	NA	13	1	not significant
SLCO2B1	c201505.graph_c4_seq48	NA	NA	12	2	not significant
CWH43	c198772.graph_c0_seq20	NA	NA	9	1	not significant
HPGDS	c185775.graph_c0_seq1	NA	NA	10	1	not significant
TENM4	c199734.graph_c0_seq4	NA	NA	10	1	not significant
STRIP1	c199657.graph_c1_seq18	NA	NA	12	2	not significant
SLITRK6	c193169.graph_c0_seq1	NA	NA	10	1	not significant
STAT6	c203617.graph_c7_seq54	NA	NA	10	2	not significant
CRIM1	c175457.graph_c0_seq4	NA	NA	13	2	not significant
ATP7B	c202577.graph_c0_seq11	NA	NA	3	3	not significant
KCNJ16	c168874.graph_c0_seq2	NA	NA	14	1	not significant
PPARD	c194182.graph_c1_seq8	NA	NA	13	2	not significant
SHROOM2	c200483.graph_c0_seq3	NA	NA	5	1	not significant
STX16	c190739.graph_c2_seq18	NA	NA	13	0	not significant
BRD7	c183883.graph_c0_seq2	NA	NA	12	2	not significant
APBA2	c190538.graph_c0_seq3	NA	NA	13	2	not significant
APBA2	c190538.graph_c0_seq7	NA	NA	13	2	not significant
PPARD	c194182.graph_c1_seq3	NA	NA	13	2	not significant
SDPR	c188766.graph_c1_seq1	NA	NA	5	2	not significant
FBXO15	c194788.graph_c0_seq11	NA	NA	5	1	not significant
SLC22A8	c192240.graph_c0_seq8	NA	NA	13	0	not significant
TPD52L2	c194434.graph_c4_seq39	NA	NA	9	1	not significant
TCTEX1D4	c161788.graph_c0_seq1	NA	NA	4	1	not significant
FAM83H	c187799.graph_c1_seq1	NA	NA	9	4	not significant
RBBP8	c198825.graph_c0_seq5	NA	NA	8	1	not significant
WDR34	c203430.graph_c7_seq70	NA	NA	9	2	not significant
GLTSCR2	c197035.graph_c1_seq2	NA	NA	12	2	not significant
ABCF3	c195390.graph_c6_seq22	NA	NA	14	1	not significant
HP	c185722.graph_c1_seq7	NA	NA	16	1	not significant
CDH6	c197492.graph_c0_seq2	NA	NA	3	2	not significant
MBD4	c198971.graph_c2_seq13	NA	NA	4	1	not significant
CERS3	c200669.graph_c3_seq24	NA	NA	6	1	not significant
EPS15	c201598.graph_c0_seq2	NA	NA	9	1	not significant
PAM	c197053.graph_c1_seq6	NA	NA	16	1	not significant
SCYL1	c201141.graph_c1_seq5	NA	NA	3	1	not significant
LHX8	c182257.graph_c0_seq5	NA	NA	9	1	not significant
PWP1	c151854.graph_c0_seq2	NA	NA	14	2	not significant
DMPK	c200145.graph_c2_seq46	NA	NA	12	1	not significant
PAM	c197053.graph_c1_seq2	NA	NA	16	1	not significant
PAM	c197053.graph_c1_seq5	NA	NA	16	1	not significant
LDLCP	c197113.graph_c0_seq52	NA	NA	6	2	not significant
TNFRSF11A	c192815.graph_c0_seq3	NA	NA	3	3	not significant
FDXR	c190679.graph_c0_seq23	NA	NA	12	1	not significant
OSR1	c187397.graph_c0_seq8	NA	NA	13	1	not significant
PCDH1	c200487.graph_c1_seq5	NA	NA	13	3	not significant
ZDHHC8	c202837.graph_c2_seq10	NA	NA	12	2	not significant
UNC13B	c199766.graph_c5_seq7	NA	NA	12	2	not significant
CATSPER2	c185160.graph_c0_seq26	NA	NA	5	2	not significant
GLTSCR1L	c170242.graph_c1_seq4	NA	NA	12	1	not significant
HIAT1	c194886.graph_c2_seq3	NA	NA	14	1	not significant
KIF26A	c201151.graph_c0_seq10	NA	NA	8	3	not significant
CTAGE5	c198749.graph_c1_seq1	NA	NA	12	3	not significant
PER2	c192354.graph_c1_seq2	NA	NA	11	4	not significant
OTUD4	c183887.graph_c0_seq1	NA	NA	13	1	not significant
LOC702143	c179600.graph_c0_seq2	NA	NA	4	3	not significant
LOC691853	c198216.graph_c0_seq3	NA	NA	14	1	not significant
AMER3	c165730.graph_c0_seq3	NA	NA	7	2	not significant
SGOL1	c188852.graph_c0_seq5	NA	NA	4	1	not significant
XRCC6BP1	c191323.graph_c0_seq8	NA	NA	9	1	not significant
ZC3H12A	c193593.graph_c0_seq2	NA	NA	11	2	not significant
CENPJ	c199121.graph_c1_seq40	NA	NA	3	3	not significant
CTAGE5	c198749.graph_c1_seq3	NA	NA	12	3	not significant
SEMA6D	c200594.graph_c0_seq36	NA	NA	5	2	not significant
PPARGC1B	c198839.graph_c0_seq6	NA	NA	3	4	not significant
CNTN6	c199502.graph_c0_seq3	NA	NA	10	1	not significant
GPR156	c170804.graph_c0_seq7	NA	NA	8	1	not significant
VWA8	c195438.graph_c0_seq1	NA	NA	9	2	not significant
ZFPL1	c184067.graph_c1_seq10_PART0	NA	NA	15	1	not significant
EFEMP2	c167419.graph_c0_seq7	NA	NA	14	1	not significant
YKT6	c188531.graph_c0_seq1	NA	NA	16	1	not significant
FIGNL1	c190475.graph_c0_seq3	NA	NA	12	1	not significant
ALG5	c176798.graph_c0_seq1	NA	NA	14	1	not significant
PCDH1	c200487.graph_c1_seq1	NA	NA	13	3	not significant
PFKFB3	c183864.graph_c0_seq1	NA	NA	14	1	not significant
KCTD3	c190877.graph_c0_seq1	NA	NA	13	1	not significant
LRRC28	c197938.graph_c2_seq3	NA	NA	14	1	not significant
MYLKB	c178753.graph_c0_seq1	NA	NA	4	3	not significant
JAG2	c187277.graph_c0_seq62	NA	NA	10	1	not significant
JAG2	c187277.graph_c0_seq55	NA	NA	10	1	not significant
FGGY	c178892.graph_c0_seq7	NA	NA	14	1	not significant
DSCAM	c201208.graph_c1_seq27	NA	NA	12	1	not significant
OS9	c180120.graph_c0_seq3	NA	NA	15	1	not significant
SERPINA1	c192910.graph_c0_seq1	NA	NA	4	2	not significant
DCAF4	c195519.graph_c0_seq15	NA	NA	4	1	not significant
SLC19A3	c191876.graph_c0_seq13	NA	NA	5	1	not significant
MTUS1	c200571.graph_c2_seq6	NA	NA	5	1	not significant
NOM1	c197785.graph_c1_seq32	NA	NA	6	1	not significant
DHDH	c186994.graph_c0_seq2	NA	NA	8	2	not significant
ERP44	c204264.graph_c0_seq1	NA	NA	15	1	not significant
GPR156	c170804.graph_c0_seq1	NA	NA	3	3	not significant
LRIT3	c188266.graph_c0_seq2	NA	NA	3	6	not significant
MTUS1	c200571.graph_c2_seq7	NA	NA	5	1	not significant
RFWD3	c195901.graph_c3_seq4	NA	NA	6	1	not significant
LRRC59	c204247.graph_c0_seq1	NA	NA	16	1	not significant
CRISPLD1	c175300.graph_c1_seq2	NA	NA	10	2	not significant
SEC24A	c203445.graph_c3_seq25	NA	NA	3	1	not significant
L1G0196	c198084.graph_c1_seq51	NA	NA	4	1	not significant
PHACTR2_9	c201622.graph_c0_seq63	NA	NA	7	1	not significant
STXBP5	c199815.graph_c6_seq18	NA	NA	13	1	not significant
PLSCR4	c200915.graph_c2_seq2	NA	NA	15	1	not significant
NOXA1	c199316.graph_c0_seq97	NA	NA	4	1	not significant
PEX5	c201877.graph_c0_seq37	NA	NA	12	2	not significant
PEX5	c201877.graph_c0_seq18	NA	NA	12	2	not significant
VARS	c202396.graph_c3_seq31	NA	NA	14	3	not significant
TIAM1	c199398.graph_c2_seq25	NA	NA	12	1	not significant
JAK3	c201337.graph_c0_seq14	NA	NA	8	2	not significant
SUOX	c197151.graph_c4_seq6	NA	NA	16	1	not significant
NECAB3	c199333.graph_c2_seq78	NA	NA	8	2	not significant
SYNRG	c198909.graph_c0_seq6	NA	NA	10	1	not significant
SLC5A12	c196081.graph_c2_seq22	NA	NA	14	2	not significant
STXBP5	c199815.graph_c6_seq17	NA	NA	13	1	not significant
MBOAT2	c189572.graph_c1_seq8	NA	NA	11	3	not significant
MEGF6	c201126.graph_c1_seq82	NA	NA	3	2	not significant
DEPDC5	c201936.graph_c1_seq26	NA	NA	5	1	not significant
NUP54	c187001.graph_c0_seq4	NA	NA	8	1	not significant
ZFAT	c197906.graph_c1_seq2	NA	NA	10	1	not significant
SIN3A	c201165.graph_c1_seq6	NA	NA	14	1	not significant
SPEM1	c199272.graph_c0_seq3	NA	NA	5	2	not significant
WDR90	c203756.graph_c1_seq15	NA	NA	3	9	not significant
SYNRG	c198909.graph_c0_seq4	NA	NA	10	1	not significant
SYNRG	c198909.graph_c0_seq31	NA	NA	10	1	not significant
IGF2R	c169031.graph_c0_seq1	NA	NA	13	4	not significant
ATXN1	c199323.graph_c0_seq29	NA	NA	10	1	not significant
HDHD2	c199270.graph_c2_seq2	NA	NA	15	1	not significant
ANKS6	c203105.graph_c0_seq8	NA	NA	6	1	not significant
COL6A1	c200768.graph_c4_seq3	NA	NA	12	2	not significant
CACHD1	c199069.graph_c0_seq5	NA	NA	14	1	not significant
C6ORF89	c203771.graph_c0_seq3	NA	NA	11	2	not significant
COG3	c203165.graph_c1_seq35	NA	NA	4	2	not significant
PLEKHH1	c197054.graph_c0_seq4	NA	NA	8	1	not significant
ZGC:85866	c183920.graph_c0_seq4	NA	NA	13	3	not significant
MASP1	c203779.graph_c1_seq5	NA	NA	8	4	not significant
LOC709497	c179454.graph_c0_seq6	NA	NA	14	1	not significant
PDYN	c196699.graph_c1_seq1	NA	NA	5	2	not significant
DMPK	c200145.graph_c2_seq5	NA	NA	13	1	not significant
TPGS1	c197629.graph_c0_seq1	NA	NA	12	1	not significant
EGF	c202511.graph_c3_seq20	NA	NA	4	0	not significant
PACSIN3	c181052.graph_c0_seq4	NA	NA	12	1	not significant
TBC1D2	c202630.graph_c0_seq4	NA	NA	3	2	not significant
GPLD1	c197760.graph_c0_seq9	NA	NA	9	1	not significant
CD2	c194111.graph_c1_seq7	NA	NA	3	3	not significant
MFGE8	c181439.graph_c1_seq3	NA	NA	8	2	not significant
ODF2A	c199312.graph_c0_seq25	NA	NA	7	1	not significant
ODF2A	c199312.graph_c0_seq53	NA	NA	7	1	not significant
APOB	c191338.graph_c0_seq7	NA	NA	8	6	not significant
NLRP14	c175798.graph_c0_seq9	NA	NA	4	3	not significant
ZMYND11	c155301.graph_c0_seq7	NA	NA	15	1	not significant
ZBBX	c200749.graph_c0_seq12	NA	NA	3	1	not significant
FAM13B	c200750.graph_c2_seq33	NA	NA	11	1	not significant
PDE4D	c196236.graph_c0_seq7	NA	NA	9	1	not significant
PRMT6	c196683.graph_c3_seq2	NA	NA	12	2	not significant
GAPVD1	c199266.graph_c1_seq50	NA	NA	14	1	not significant
RGS12	c203064.graph_c0_seq10	NA	NA	5	5	not significant
APOD	c179900.graph_c0_seq1	NA	NA	11	1	not significant
LINGO4	c200130.graph_c0_seq3	NA	NA	12	1	not significant
ZMYND11	c155301.graph_c0_seq1	NA	NA	16	1	not significant
ODF2A	c199312.graph_c0_seq16	NA	NA	7	1	not significant
MFN1	c188120.graph_c0_seq4	NA	NA	14	1	not significant
LAMA4	c201681.graph_c0_seq4	NA	NA	12	2	not significant
EEF1A2	c173564.graph_c0_seq2	NA	NA	13	1	not significant
NELL1	c197583.graph_c0_seq4	NA	NA	10	1	not significant
ODF2A	c199312.graph_c0_seq1	NA	NA	7	1	not significant
WDR81	c200534.graph_c0_seq26	NA	NA	8	2	not significant
LRRC66	c199709.graph_c3_seq15	NA	NA	4	2	not significant
SCNN1B	c198208.graph_c1_seq34	NA	NA	11	1	not significant
C6ORF211	c141307.graph_c0_seq2	NA	NA	11	1	not significant
FAM194A	c192474.graph_c0_seq8	NA	NA	3	0	not significant
GABRB1	c169378.graph_c0_seq6	NA	NA	10	1	not significant
FAM189B	c191746.graph_c0_seq2	NA	NA	4	1	not significant
FAM63A	c190486.graph_c2_seq19	NA	NA	7	1	not significant
TRIM67	c197422.graph_c2_seq1	NA	NA	7	0	not significant
ALG6	c200111.graph_c0_seq6	NA	NA	12	1	not significant
INTU	c191900.graph_c1_seq8	NA	NA	7	1	not significant
GPR124	c195989.graph_c0_seq35	NA	NA	3	2	not significant
CDC26	c145460.graph_c1_seq2	NA	NA	16	0	not significant
ADAMTS20	c203290.graph_c0_seq36	NA	NA	9	1	not significant
C1ORF168	c191918.graph_c0_seq11	NA	NA	3	3	not significant
GPRIN3	c190565.graph_c0_seq2	NA	NA	8	1	not significant
ACP6	c198721.graph_c0_seq8	NA	NA	14	1	not significant
SF3B6	c170280.graph_c0_seq3	NA	NA	16	0	not significant
THNSL1	c197303.graph_c0_seq4	NA	NA	14	1	not significant
GLI3	c178968.graph_c0_seq2	NA	NA	10	2	not significant
ADAD1	c157533.graph_c0_seq2	NA	NA	10	1	not significant
SFRS13A	c191130.graph_c1_seq4	NA	NA	3	0	not significant
C1ORF192	c187705.graph_c0_seq3	NA	NA	7	1	not significant
MANBA	c200074.graph_c2_seq7	NA	NA	12	1	not significant
MBD4	c198971.graph_c2_seq10	NA	NA	4	1	not significant
ABCA2	c201519.graph_c4_seq79	NA	NA	13	1	not significant
CCDC157	c202488.graph_c0_seq1	NA	NA	4	3	not significant
AXIN1	c200653.graph_c0_seq21	NA	NA	12	1	not significant
MAATS1	c194970.graph_c3_seq23	NA	NA	8	1	not significant
GRPR	c284639.graph_c0_seq1	NA	NA	11	2	not significant
CASP3	c186685.graph_c0_seq2	NA	NA	14	0	not significant
ESRP1	c199786.graph_c2_seq6	NA	NA	10	1	not significant
ZC3HAV1	c198784.graph_c1_seq4	NA	NA	6	1	not significant
ACRBP	c200077.graph_c2_seq6	NA	NA	11	4	not significant
QSOX2	c179058.graph_c0_seq5	NA	NA	10	2	not significant
ESRP1	c199786.graph_c2_seq3	NA	NA	10	1	not significant
DMPK	c200145.graph_c2_seq2	NA	NA	12	1	not significant
OPTN	c198531.graph_c1_seq1	NA	NA	16	1	not significant
LRFN3	c198679.graph_c2_seq2	NA	NA	11	1	not significant
ZMAT3	c180230.graph_c0_seq1	NA	NA	13	1	not significant
BCKDK	c201496.graph_c2_seq30	NA	NA	14	1	not significant
FGL2	c196614.graph_c0_seq1	NA	NA	7	1	not significant
BCKDK	c201496.graph_c2_seq29	NA	NA	14	1	not significant
LRRC8D	c180588.graph_c0_seq1	NA	NA	15	1	not significant
LDB1	c162157.graph_c0_seq3	NA	NA	14	0	not significant
TSSK3	c138185.graph_c0_seq2	NA	NA	10	1	not significant
ASXL1	c199040.graph_c0_seq12	NA	NA	9	0	not significant
TEAD2	c201473.graph_c3_seq2	NA	NA	3	1	not significant
ERMARD	c199419.graph_c7_seq38	NA	NA	3	2	not significant
PACSIN1	c180121.graph_c0_seq2	NA	NA	12	0	not significant
POMT1	c201420.graph_c1_seq13	NA	NA	12	1	not significant
CSRP1	c194418.graph_c0_seq1	NA	NA	17	2	not significant
EML3	c202459.graph_c4_seq6	NA	NA	14	3	not significant
VCP	c179871.graph_c0_seq1	NA	NA	15	0	not significant
ARPP21	c203308.graph_c1_seq6	NA	NA	4	1	not significant
ESRP1	c199786.graph_c2_seq2	NA	NA	10	1	not significant
TXN	c204079.graph_c0_seq1	NA	NA	16	0	not significant
COL4A2	c168744.graph_c0_seq1	NA	NA	10	2	not significant
SPRED3	c200116.graph_c0_seq32	NA	NA	10	1	not significant
MEI1	c203008.graph_c1_seq35	NA	NA	9	4	not significant
KIAA1324L	c200772.graph_c7_seq2	NA	NA	11	4	not significant
IRF5	c172823.graph_c0_seq5	NA	NA	4	1	not significant
MCC	c185337.graph_c0_seq13	NA	NA	12	1	not significant
SYNGR1A	c199114.graph_c1_seq2	NA	NA	13	0	not significant
WDR3	c198009.graph_c0_seq5	NA	NA	13	1	not significant
LDLR	c195170.graph_c0_seq12	NA	NA	5	1	not significant
HTR3A	c261334.graph_c0_seq1	NA	NA	10	0	not significant
C11ORF82	c199208.graph_c2_seq8	NA	NA	6	1	not significant
SPEF1	c199441.graph_c8_seq6_PART1	NA	NA	12	1	not significant
PRRG3	c201475.graph_c4_seq3	NA	NA	11	0	not significant
ADAMDEC1	c204285.graph_c0_seq1	NA	NA	4	3	not significant
FAM208B	c201260.graph_c1_seq3	NA	NA	5	0	not significant
SPTBN1	c197656.graph_c7_seq7	NA	NA	14	1	not significant
SEC16B	c201565.graph_c0_seq15	NA	NA	4	1	not significant
EZH2	c198424.graph_c1_seq86	NA	NA	11	0	not significant
COL6A6	c203637.graph_c0_seq11	NA	NA	9	4	not significant
GPC1	c138389.graph_c0_seq1	NA	NA	12	1	not significant
GIMAP7	c194526.graph_c1_seq3	NA	NA	4	1	not significant
NSRP1	c165640.graph_c0_seq3	NA	NA	15	1	not significant
DENND1A	c201281.graph_c2_seq28	NA	NA	6	0	not significant
ZMYM1	c188391.graph_c0_seq15	NA	NA	3	3	not significant
CCDC181	c184266.graph_c0_seq5	NA	NA	11	3	not significant
DDX27	c184875.graph_c0_seq1	NA	NA	14	0	not significant
SLC6A12	c196205.graph_c1_seq140	NA	NA	10	1	not significant
KIAA0355	c197246.graph_c0_seq18	NA	NA	14	3	not significant
ATXN2L	c198379.graph_c1_seq6	NA	NA	11	2	not significant
CHD3	c200029.graph_c2_seq15	NA	NA	14	0	not significant
GABBR2	c202443.graph_c2_seq4	NA	NA	13	0	not significant
LOC694817	c202538.graph_c0_seq18	NA	NA	7	2	not significant
NCOA6_4	c190908.graph_c2_seq5	NA	NA	4	5	not significant
RWDD2B	c194532.graph_c0_seq1	NA	NA	13	1	not significant
ENTHD1	c184715.graph_c0_seq11	NA	NA	3	1	not significant
PIP5K1B	c204984.graph_c0_seq1	NA	NA	13	1	not significant
TCEA3	c194435.graph_c0_seq2	NA	NA	14	0	not significant
TTPAL	c195005.graph_c2_seq9	NA	NA	3	0	not significant
RWDD1	c191307.graph_c0_seq1	NA	NA	14	0	not significant
MAGEL2	c216788.graph_c0_seq1	NA	NA	4	4	not significant
TAPT1	c194298.graph_c3_seq10	NA	NA	14	0	not significant
PIGO	c199319.graph_c0_seq11	NA	NA	11	0	not significant
HAPLN1	c197895.graph_c0_seq1	NA	NA	11	0	not significant
POLR3D	c201196.graph_c6_seq44	NA	NA	15	0	not significant
SUCO	c194960.graph_c2_seq4	NA	NA	12	1	not significant
DENND4C	c183990.graph_c2_seq6	NA	NA	13	0	not significant
NXPE4	c202784.graph_c0_seq24	NA	NA	6	2	not significant
MCC	c185337.graph_c0_seq8	NA	NA	12	1	not significant
SLC45A4	c200170.graph_c1_seq1	NA	NA	12	1	not significant
SLCO2B1	c201505.graph_c4_seq11	NA	NA	12	2	not significant
GTF2E1	c187089.graph_c0_seq3	NA	NA	13	0	not significant
LOC696036	c191603.graph_c0_seq1	NA	NA	14	0	not significant
NRXN2	c195421.graph_c0_seq43	NA	NA	11	0	not significant
ZNF407	c176516.graph_c0_seq2	NA	NA	9	1	not significant
GPR155	c197423.graph_c0_seq2	NA	NA	3	1	not significant
LZTR1	c203485.graph_c0_seq40	NA	NA	14	0	not significant
CCDC88A	c203179.graph_c6_seq6	NA	NA	12	0	not significant
ECT2	c192758.graph_c0_seq1	NA	NA	10	0	not significant
BANP	c199282.graph_c0_seq3	NA	NA	12	0	not significant
CRLS1	c159940.graph_c0_seq1	NA	NA	13	0	not significant
TMPRSS13	c193543.graph_c0_seq2	NA	NA	3	1	not significant
KIAA2018	c162440.graph_c0_seq2	NA	NA	12	2	not significant
TRIM32	c200571.graph_c2_seq4	NA	NA	15	2	not significant
RASSF8	c174788.graph_c0_seq2	NA	NA	17	0	not significant
RASSF8	c174788.graph_c0_seq1	NA	NA	17	0	not significant
PTGS1	c194160.graph_c0_seq11	NA	NA	12	1	not significant
KIAA0100	c191606.graph_c1_seq2	NA	NA	14	0	not significant
LRRC1	c181480.graph_c0_seq9	NA	NA	11	0	not significant
ZFP655	c202693.graph_c3_seq44	NA	NA	3	0	not significant
RPL3L	c183330.graph_c0_seq2	NA	NA	8	2	not significant
SPTLC2	c201155.graph_c1_seq1	NA	NA	14	0	not significant
FRYL	c200464.graph_c0_seq27	NA	NA	13	0	not significant
NAP1L4	c203057.graph_c8_seq1	NA	NA	15	0	not significant
PDS5B	c201880.graph_c0_seq5	NA	NA	14	0	not significant
RSPO3	c603551.graph_c0_seq1	NA	NA	13	0	not significant
DZIP3	c200628.graph_c1_seq29	NA	NA	10	0	not significant
FBXL14	c182853.graph_c0_seq1	NA	NA	11	0	not significant
HOOK2	c200758.graph_c0_seq96	NA	NA	9	0	not significant
HMG20A	c177723.graph_c1_seq5	NA	NA	15	0	not significant
POLE	c202701.graph_c2_seq20	NA	NA	9	0	not significant
NLGN3	c196929.graph_c4_seq3	NA	NA	11	0	not significant
C16ORF62	c201756.graph_c0_seq6	NA	NA	14	0	not significant
LRRC40	c168683.graph_c0_seq2	NA	NA	11	0	not significant
FAM171B	c175624.graph_c0_seq1	NA	NA	13	1	not significant
AGAP_AGAP003135	c187314.graph_c0_seq7	NA	NA	15	0	not significant
FANCD2	c192963.graph_c5_seq1	NA	NA	12	0	not significant
ARHGEF26	c200318.graph_c0_seq14	NA	NA	11	2	not significant
BBS9	c200837.graph_c1_seq20	NA	NA	10	0	not significant
SYK	c194904.graph_c1_seq7	NA	NA	12	0	not significant
L3MBTL1	c200916.graph_c0_seq5	NA	NA	8	1	not significant
OS9	c180120.graph_c0_seq2	NA	NA	16	0	not significant
ZNF609	c189764.graph_c0_seq3	NA	NA	14	0	not significant
LETM1	c201688.graph_c6_seq8	NA	NA	12	0	not significant
HSD17B4	c162489.graph_c0_seq2	NA	NA	15	3	not significant
DDHD1	c198832.graph_c6_seq49	NA	NA	9	0	not significant
SMAD2	c199620.graph_c0_seq4	NA	NA	13	0	not significant
TOPORS	c187095.graph_c0_seq1	NA	NA	14	1	not significant
SEMA4D	c198015.graph_c2_seq12	NA	NA	11	0	not significant
PUS7L	c195131.graph_c0_seq2	NA	NA	10	0	not significant
C19ORF40	c194191.graph_c0_seq2	NA	NA	11	1	not significant
CFI	c183950.graph_c0_seq1	NA	NA	10	0	not significant
ATG2B	c202623.graph_c0_seq6	NA	NA	12	0	not significant
ADK	c178823.graph_c0_seq2	NA	NA	14	0	not significant
KLHDC10	c200928.graph_c1_seq1	NA	NA	13	0	not significant
OSBPL5	c203187.graph_c0_seq2	NA	NA	10	0	not significant
CNR1	c199174.graph_c0_seq1	NA	NA	13	0	not significant
IL16	c201410.graph_c0_seq8	NA	NA	10	0	not significant
CHD1	c201086.graph_c3_seq7	NA	NA	12	0	not significant
FZR1	c200713.graph_c11_seq2	NA	NA	11	0	not significant
LGR5	c189209.graph_c0_seq4	NA	NA	3	0	not significant
ADK	c178823.graph_c0_seq3	NA	NA	14	0	not significant
POLR3F	c195611.graph_c5_seq15	NA	NA	13	0	not significant
PTP4A2	c143092.graph_c1_seq1	NA	NA	14	0	not significant
PSMD3	c110098.graph_c0_seq1	NA	NA	16	0	not significant
GYS1	c202549.graph_c3_seq1	NA	NA	12	0	not significant
FAM102A	c179869.graph_c0_seq4	NA	NA	13	0	not significant
ZNF451	c199497.graph_c5_seq12	NA	NA	7	0	not significant
ACOX1	c199726.graph_c23_seq5	NA	NA	12	0	not significant
LAS1L	c174429.graph_c0_seq6	NA	NA	6	0	not significant
LOC709615	c189998.graph_c1_seq15	NA	NA	12	0	not significant
ESRP1	c199786.graph_c2_seq1	NA	NA	10	1	not significant
ABCG2	c203681.graph_c1_seq4	NA	NA	3	2	not significant
KLF12	c202790.graph_c3_seq6	NA	NA	12	0	not significant
GPR108	c195405.graph_c1_seq25	NA	NA	10	0	not significant
CHRM4	c167471.graph_c0_seq2	NA	NA	13	0	not significant
SYK	c194904.graph_c1_seq17	NA	NA	12	0	not significant
MKKS	c192876.graph_c0_seq2	NA	NA	14	0	not significant
POMK	c161157.graph_c1_seq1	NA	NA	11	0	not significant
DCTN3	c203519.graph_c1_seq6	NA	NA	16	0	not significant
SYS1	c186892.graph_c0_seq1	NA	NA	10	0	not significant
ASB3	c190570.graph_c1_seq23	NA	NA	10	0	not significant
CXCR5	c108916.graph_c0_seq1	NA	NA	11	0	not significant
FEM1B	c203773.graph_c0_seq20	NA	NA	14	0	not significant
TNFAIP8	c161339.graph_c0_seq2	NA	NA	14	0	not significant
TLK2	c169293.graph_c0_seq1	NA	NA	13	0	not significant
TRAFD1	c196698.graph_c6_seq7	NA	NA	14	1	not significant
SCAF8	c185046.graph_c0_seq1	NA	NA	12	0	not significant
FAM210B	c169892.graph_c0_seq1	NA	NA	10	0	not significant
FCGR1A	c147644.graph_c0_seq2	NA	NA	3	2	not significant
PGAM2	c156452.graph_c0_seq1	NA	NA	13	0	not significant
LRRC58	c192353.graph_c0_seq1	NA	NA	11	0	not significant
POSTN	c192270.graph_c0_seq11	NA	NA	11	0	not significant
ATP6V1B1	c176964.graph_c0_seq1	NA	NA	12	0	not significant
ARAP1	c200079.graph_c5_seq95	NA	NA	5	1	not significant
MYBPC1	c202837.graph_c0_seq4	NA	NA	11	0	not significant
AWAT1	c171930.graph_c0_seq3	NA	NA	9	0	not significant
MET	c190459.graph_c0_seq2	NA	NA	12	0	not significant
ATP1A3	c197341.graph_c3_seq14	NA	NA	11	0	not significant
MTMR3	c195977.graph_c0_seq7	NA	NA	14	0	not significant
LLGL1	c188619.graph_c0_seq9	NA	NA	9	1	not significant
RSRC1_8	c171107.graph_c0_seq2	NA	NA	15	0	not significant
DOCK3	c201712.graph_c0_seq81	NA	NA	12	0	not significant
MCMDC2	c187872.graph_c0_seq8	NA	NA	9	1	not significant
PRICKLE1	c197087.graph_c2_seq1	NA	NA	12	0	not significant
TRIM50	c169677.graph_c0_seq15	NA	NA	11	0	not significant
FBLN1	c185048.graph_c0_seq4	NA	NA	10	0	not significant
SMC1A	c183111.graph_c0_seq1	NA	NA	14	0	not significant
PEMT	c184073.graph_c0_seq10	NA	NA	10	0	not significant
EPG5	c201670.graph_c0_seq7	NA	NA	13	0	not significant
KDM5C	c197953.graph_c0_seq11	NA	NA	11	1	not significant
AARS2	c200666.graph_c0_seq16	NA	NA	11	0	not significant
SMEK1	c188677.graph_c0_seq19	NA	NA	14	0	not significant
TMEM179	c201197.graph_c0_seq4	NA	NA	11	0	not significant
TBC1D8B	c195295.graph_c0_seq22	NA	NA	11	0	not significant
LRRTM3	c165549.graph_c0_seq2	NA	NA	13	0	not significant
CNTFR	c191342.graph_c3_seq2	NA	NA	13	0	not significant
BECN1	c196750.graph_c0_seq3	NA	NA	16	0	not significant
RABL6	c196609.graph_c2_seq6	NA	NA	11	0	not significant
GPAM	c193870.graph_c0_seq19	NA	NA	11	0	not significant
PMEPA1	c204418.graph_c0_seq1	NA	NA	14	0	not significant
CTDNEP1	c201019.graph_c0_seq1_PART0	NA	NA	17	0	not significant
PTPN2B	c200216.graph_c0_seq1	NA	NA	15	0	not significant
HTR2C	c192084.graph_c0_seq2	NA	NA	3	0	not significant
DARS2	c192076.graph_c0_seq2	NA	NA	9	0	not significant
CEP85	c189570.graph_c1_seq9	NA	NA	8	0	not significant
NAA25	c196863.graph_c4_seq1	NA	NA	11	0	not significant
MAPK6	c184164.graph_c0_seq3	NA	NA	15	0	not significant
BACH1	c195544.graph_c0_seq1	NA	NA	10	0	not significant
SLC16A5	c179116.graph_c0_seq3	NA	NA	9	0	not significant
TBCK	c196174.graph_c0_seq4	NA	NA	11	0	not significant
[truncated: 8,748 more rows]
