# Supplementary material for: Long-lived rodents reveal signatures of positive selection in genes associated with lifespan
Source: PLoS Genet. 2018 Mar 23;14(3):e1007272. doi: 10.1371/journal.pgen.1007272 (PMC5884551; doi:10.1371/journal.pgen.1007272)
Supplement: S23 Table — (XLSX) [file pgen.1007272.s027.xlsx]

## Sheet: Table
S23 Table. PSGs in aging relevant summarized REVIGO categories and quadrant 1 (up-regulated in rat and down-regulated in naked mole-rat).
Entrez_ID	Entrez_gene_symbol	Our_gene_symbol	Quadrant_1	Translation	Cellular_respiration
2651	GCNT2	GCNT2	TRUE	FALSE	TRUE
3708	ITPR1	ITPR1	TRUE	FALSE	TRUE
3773	KCNJ16	KCNJ16	TRUE	FALSE	FALSE
4061	LY6E	LY6E	TRUE	FALSE	FALSE
4704	NDUFA9	NDUFA9	TRUE	TRUE	TRUE
29993	PACSIN1	PACSIN1	TRUE	FALSE	FALSE
201799	TMEM154	TMEM154	TRUE	FALSE	FALSE
283383	ADGRD1	GPR133	TRUE	FALSE	TRUE
5604	MAP2K1	MAP2K1	TRUE	FALSE	FALSE
4318	MMP9	MMP9	TRUE	TRUE	FALSE
6332	SCN7A	SCN7A	TRUE	FALSE	FALSE
132	ADK	ADK	TRUE	FALSE	TRUE
9973	CCS	CCS	TRUE	FALSE	TRUE
969	CD69	CD69	TRUE	FALSE	FALSE
1312	COMT	COMT	TRUE	TRUE	TRUE
606495	CYB5RL	CYB5RL	TRUE	FALSE	TRUE
25975	EGFL6	EGFL6	TRUE	FALSE	FALSE
2244	FGB	FGB	TRUE	FALSE	FALSE
2651	GCNT2	GCNT2	TRUE	FALSE	TRUE
3556	IL1RAP	IL1RAP	TRUE	FALSE	FALSE
92856	IMP4	IMP4	TRUE	FALSE	FALSE
3993	LLGL2	LLGL2	TRUE	FALSE	FALSE
54627	MAP10	MAP10	TRUE	FALSE	FALSE
10205	MPZL2	MPZL2	TRUE	FALSE	FALSE
4853	NOTCH2	NOTCH2	TRUE	FALSE	FALSE
84955	NUDCD1	NUDCD1	TRUE	FALSE	FALSE
6009	RHEB	RHEB	TRUE	FALSE	FALSE
440400	RNASEK	RNASEK	TRUE	FALSE	FALSE
54949	SDHAF2	SDHAF2	TRUE	FALSE	TRUE
7784	ZP3	ZP3	TRUE	FALSE	TRUE
375	ARF1	ARF1	TRUE	FALSE	TRUE
51263	MRPL30	MRPL30	TRUE	TRUE	TRUE
64963	MRPS11	MRPS11	TRUE	TRUE	TRUE
54539	NDUFB11	NDUFB11	TRUE	FALSE	TRUE
883	CCBL1	CCBL1	TRUE	TRUE	TRUE
3290	HSD11B1	HSD11B1	TRUE	FALSE	TRUE
1528	CYB5A	CYB5A	TRUE	FALSE	TRUE
7018	TF	TF	TRUE	FALSE	FALSE
967	CD63	CD63	TRUE	FALSE	FALSE
285855	RPL7L1	RPL7L1	TRUE	TRUE	FALSE
10005	ACOT8	ACOT8	TRUE	TRUE	TRUE
570	BAAT	BAAT	TRUE	TRUE	TRUE
27351	DESI1	DESI1	TRUE	FALSE	FALSE
80168	MOGAT2	MOGAT2	TRUE	FALSE	TRUE
5360	PLTP	PLTP	TRUE	FALSE	TRUE
624	BDKRB2	BDKRB2	TRUE	FALSE	FALSE
1611	DAP	DAP	TRUE	FALSE	FALSE
2867	FFAR2	FFAR2	TRUE	FALSE	FALSE
3988	LIPA	LIPA	TRUE	FALSE	TRUE
56413	LTB4R2	LTB4R2	TRUE	FALSE	TRUE
5066	PAM	PAM	TRUE	FALSE	TRUE
5692	PSMB4	PSMB4	TRUE	TRUE	FALSE
117177	RAB3IP	RAB3IP	TRUE	FALSE	FALSE
6492	SIM1	SIM1	TRUE	FALSE	FALSE
51337	THEM6	THEM6	TRUE	FALSE	FALSE
8647	ABCB11	ABCB11	TRUE	FALSE	TRUE
325	APCS	APCS	TRUE	FALSE	FALSE
55937	APOM	APOM	TRUE	FALSE	TRUE
55207	ARL8B	ARL8B	TRUE	FALSE	FALSE
3075	CFH	CFH	TRUE	FALSE	FALSE
51397	COMMD10	COMMD10	TRUE	FALSE	FALSE
6376	CX3CL1	CX3CL1	TRUE	FALSE	FALSE
51280	GOLM1	GOLM1	TRUE	FALSE	FALSE
57678	GPAM	GPAM	TRUE	FALSE	TRUE
4854	NOTCH3	NOTCH3	TRUE	FALSE	FALSE
949	SCARB1	SCARB1	TRUE	TRUE	TRUE
6648	SOD2	SOD2	TRUE	FALSE	TRUE
7033	TFF3	TFF3	TRUE	FALSE	FALSE
143187	VTI1A	VTI1A	TRUE	FALSE	FALSE
10347	ABCA7	ABCA7	FALSE	FALSE	FALSE
287	ANK2	ANK2	FALSE	FALSE	FALSE
492	ATP2B3	ATP2B3	FALSE	FALSE	FALSE
29097	CNIH4	CNIH4	FALSE	FALSE	FALSE
127534	GJB4	GJB4	FALSE	FALSE	FALSE
114928	GPRASP2	GPRASP2	FALSE	FALSE	FALSE
348980	HCN1	HCN1	FALSE	FALSE	FALSE
23119	HIC2	HIC2	FALSE	FALSE	FALSE
3105	HLA-A	HLA-A	FALSE	FALSE	FALSE
3852	KRT5	KRT5	FALSE	FALSE	FALSE
4069	LYZ	LYZ	FALSE	FALSE	FALSE
4134	MAP4	MAP4	FALSE	FALSE	FALSE
4624	MYH6	MYH6	FALSE	FALSE	FALSE
143503	OR51E1	OR51E1	FALSE	FALSE	FALSE
54600	UGT1A9	UGT1A9	FALSE	TRUE	FALSE
23025	UNC13A	UNC13A	FALSE	FALSE	FALSE
912	CD1D	CD1D	FALSE	FALSE	FALSE
54536	EXOC6	EXOC6	FALSE	FALSE	FALSE
55603	FAM46A	FAM46A	FALSE	FALSE	FALSE
2263	FGFR2	FGFR2	FALSE	FALSE	FALSE
2358	FPR2	FPR2	FALSE	FALSE	FALSE
9513	FXR2	FXR2	FALSE	TRUE	FALSE
2707	GJB3	GJB3	FALSE	FALSE	FALSE
51147	ING4	ING4	FALSE	FALSE	FALSE
9227	LRAT	LRAT	FALSE	FALSE	FALSE
4624	MYH6	MYH6	FALSE	FALSE	FALSE
255743	NPNT	NPNT	FALSE	FALSE	FALSE
56105	PCDHGA11	PCDHGA11	FALSE	FALSE	FALSE
10611	PDLIM5	PDLIM5	FALSE	FALSE	FALSE
121268	RHEBL1	RHEBL1	FALSE	FALSE	FALSE
6456	SH3GL2	SH3GL2	FALSE	FALSE	FALSE
28234	SLCO1B3	SLCO1B3	FALSE	FALSE	TRUE
9901	SRGAP3	SRGAP3	FALSE	FALSE	FALSE
10460	TACC3	TACC3	FALSE	FALSE	FALSE
56155	TEX14	TEX14	FALSE	TRUE	FALSE
23112	TNRC6B	TNRC6B	FALSE	TRUE	FALSE
7170	TPM3	TPM3	FALSE	FALSE	FALSE
85363	TRIM5	TRIM5	FALSE	FALSE	FALSE
79989	TTC26	TTC26	FALSE	FALSE	FALSE
10381	TUBB3	TUBB3	FALSE	FALSE	FALSE
54600	UGT1A9	UGT1A9	FALSE	TRUE	FALSE
165904	XIRP1	XIRP1	FALSE	FALSE	FALSE
286128	ZFP41	ZFP41	FALSE	FALSE	FALSE
58	ACTA1	ACTA1	FALSE	FALSE	FALSE
10768	AHCYL1	AHCYL1	FALSE	TRUE	FALSE
269	AMHR2	AMHR2	FALSE	FALSE	FALSE
168620	BHLHA15	BHLHA15	FALSE	FALSE	FALSE
256309	CCDC110	CCDC110	FALSE	FALSE	FALSE
339829	CCDC39	CCDC39	FALSE	FALSE	FALSE
55125	CEP192	CEP192	FALSE	FALSE	FALSE
10669	CGREF1	CGREF1	FALSE	FALSE	FALSE
1649	DDIT3	DDIT3	FALSE	FALSE	FALSE
641700	ECSCR	ECSCR	FALSE	FALSE	FALSE
7957	EPM2A	EPM2A	FALSE	FALSE	TRUE
401565	FAM166A	FAM166A	FALSE	FALSE	FALSE
2595	GANC	GANC	FALSE	FALSE	FALSE
3105	HLA-A	HLA-A	FALSE	FALSE	FALSE
3222	HOXC5	HOXC5	FALSE	FALSE	FALSE
3294	HSD17B2	HSD17B2	FALSE	FALSE	TRUE
388324	INCA1	INCA1	FALSE	FALSE	FALSE
1326	MAP3K8	MAP3K8	FALSE	FALSE	FALSE
343263	MYBPHL	MYBPHL	FALSE	FALSE	FALSE
55916	NXT2	NXT2	FALSE	FALSE	FALSE
390151	OR8H2	OR8H2	FALSE	FALSE	FALSE
9708	PCDHGA8	PCDHGA8	FALSE	FALSE	FALSE
345456	PFN3	PFN3	FALSE	FALSE	FALSE
5322	PLA2G5	PLA2G5	FALSE	TRUE	TRUE
9701	PPP6R2	PPP6R2	FALSE	FALSE	FALSE
84795	PYROXD2	PYROXD2	FALSE	FALSE	TRUE
221662	RBM24	RBM24	FALSE	FALSE	FALSE
51750	RTEL1	RTEL1	FALSE	FALSE	TRUE
388228	SBK1	SBK1	FALSE	FALSE	FALSE
80723	SLC35G2	SLC35G2	FALSE	FALSE	FALSE
10579	TACC2	TACC2	FALSE	FALSE	FALSE
57707	TLDC1	TLDC1	FALSE	FALSE	FALSE
51522	TMEM14C	TMEM14C	FALSE	FALSE	TRUE
1831	TSC22D3	TSC22D3	FALSE	FALSE	FALSE
26043	UBXN7	UBXN7	FALSE	FALSE	FALSE
7385	UQCRC2	UQCRC2	FALSE	FALSE	TRUE
286128	ZFP41	ZFP41	FALSE	FALSE	FALSE
7755	ZNF205	ZNF205	FALSE	FALSE	FALSE
1674	DES	DES	FALSE	FALSE	FALSE
344018	FIGLA	FIGLA	FALSE	FALSE	FALSE
388646	GBP7	GBP7	FALSE	FALSE	FALSE
5526	PPP2R5B	PPP2R5B	FALSE	FALSE	FALSE
54103	GSAP	GSAP	FALSE	FALSE	FALSE
9356	SLC22A6	SLC22A6	FALSE	FALSE	FALSE
6542	SLC7A2	SLC7A2	FALSE	FALSE	FALSE
163590	TOR1AIP2	TOR1AIP2	FALSE	FALSE	FALSE
197	AHSG	AHSG	FALSE	TRUE	FALSE
284340	CXCL17	CXCL17	FALSE	FALSE	FALSE
23581	CASP14	CASP14	FALSE	FALSE	FALSE
1580	CYP4B1	CYP4B1	FALSE	FALSE	TRUE
84656	GLYR1	GLYR1	FALSE	FALSE	TRUE
57467	HHATL	HHATL	FALSE	FALSE	FALSE
7295	TXN	TXN	FALSE	FALSE	TRUE
286128	ZFP41	ZFP41	FALSE	FALSE	FALSE
334	APLP2	APLP2	FALSE	TRUE	TRUE
374907	B3GNT8	B3GNT8	FALSE	FALSE	TRUE
3479	IGF1	IGF1	FALSE	TRUE	TRUE
55686	MREG	MREG	FALSE	FALSE	FALSE
51268	PIPOX	PIPOX	FALSE	TRUE	TRUE
113675	SDSL	SDSL	FALSE	FALSE	FALSE
6565	SLC15A2	SLC15A2	FALSE	FALSE	FALSE
219736	STOX1	STOX1	FALSE	FALSE	FALSE
79719	AAGAB	AAGAB	FALSE	FALSE	FALSE
269	AMHR2	AMHR2	FALSE	FALSE	FALSE
411	ARSB	ARSB	FALSE	FALSE	FALSE
714	C1QC	C1QC	FALSE	FALSE	FALSE
113130	CDCA5	CDCA5	FALSE	FALSE	FALSE
1010	CDH12	CDH12	FALSE	FALSE	FALSE
118881	COMTD1	COMTD1	FALSE	FALSE	FALSE
84987	COX14	COX14	FALSE	FALSE	FALSE
3579	CXCR2	CXCR2	FALSE	FALSE	FALSE
1613	DAPK3	DAPK3	FALSE	TRUE	FALSE
55208	DCUN1D2	DCUN1D2	FALSE	FALSE	FALSE
10455	ECI2	ECI2	FALSE	TRUE	TRUE
644054	FAM25C	FAM25C	FALSE	FALSE	FALSE
55507	GPRC5D	GPRC5D	FALSE	FALSE	FALSE
8226	PUDP	HDHD1	FALSE	FALSE	TRUE
55127	HEATR1	HEATR1	FALSE	FALSE	FALSE
25994	HIGD1A	HIGD1A	FALSE	FALSE	TRUE
3155	HMGCL	HMGCL	FALSE	TRUE	TRUE
3920	LAMP2	LAMP2	FALSE	FALSE	FALSE
3960	LGALS4	LGALS4	FALSE	FALSE	FALSE
9053	MAP7	MAP7	FALSE	FALSE	FALSE
83742	MARVELD1	MARVELD1	FALSE	FALSE	FALSE
29088	MRPL15	MRPL15	FALSE	TRUE	TRUE
692094	MSMP	MSMP	FALSE	FALSE	FALSE
6490	PMEL	PMEL	FALSE	FALSE	TRUE
57645	POGK	POGK	FALSE	FALSE	FALSE
8496	PPFIBP1	PPFIBP1	FALSE	FALSE	FALSE
55119	PRPF38B	PRPF38B	FALSE	FALSE	FALSE
8624	PSMG1	PSMG1	FALSE	FALSE	FALSE
1757	SARDH	SARDH	FALSE	TRUE	TRUE
9673	SLC25A44	SLC25A44	FALSE	TRUE	FALSE
113235	SLC46A1	SLC46A1	FALSE	TRUE	FALSE
6522	SLC4A2	SLC4A2	FALSE	FALSE	FALSE
57152	SLURP1	SLURP1	FALSE	FALSE	FALSE
51259	TMEM216	TMEM216	FALSE	FALSE	FALSE
51095	TRNT1	TRNT1	FALSE	FALSE	FALSE
9341	VAMP3	VAMP3	FALSE	FALSE	FALSE
6833	ABCC8	ABCC8	FALSE	FALSE	TRUE
177	AGER	AGER	FALSE	FALSE	TRUE
150160	CCT8L2	CCT8L2	FALSE	FALSE	FALSE
958	CD40	CD40	FALSE	FALSE	FALSE
55783	CMTR2	CMTR2	FALSE	FALSE	FALSE
1292	COL6A2	COL6A2	FALSE	FALSE	FALSE
1521	CTSW	CTSW	FALSE	FALSE	FALSE
51473	DCDC2	DCDC2	FALSE	FALSE	FALSE
55601	DDX60	DDX60	FALSE	FALSE	FALSE
84080	ENKD1	ENKD1	FALSE	FALSE	FALSE
2053	EPHX2	EPHX2	FALSE	FALSE	TRUE
2864	FFAR1	FFAR1	FALSE	FALSE	TRUE
63979	FIGNL1	FIGNL1	FALSE	FALSE	FALSE
2358	FPR2	FPR2	FALSE	FALSE	FALSE
283459	GATC	GATC	FALSE	TRUE	TRUE
80045	GPR157	GPR157	FALSE	FALSE	FALSE
4057	LTF	LTF	FALSE	FALSE	FALSE
5447	POR	POR	FALSE	TRUE	TRUE
64766	S100PBP	S100PBP	FALSE	FALSE	FALSE
220134	SKA1	SKA1	FALSE	FALSE	FALSE
9144	SYNGR2	SYNGR2	FALSE	FALSE	FALSE
90139	TSPAN18	TSPAN18	FALSE	FALSE	FALSE
7265	TTC1	TTC1	FALSE	FALSE	FALSE
124739	USP43	USP43	FALSE	FALSE	TRUE
